# Supplementary material
Source: PubMed Central journal article supplement (PMC2645987)
Supplement: NIHMS91320-supplement-1_si_001.pdf [file NIHMS91320-supplement-1_si_001.pdf]

**Conformational Interconversion of the *trans*-4-Hydroxynonenal-Derived (6*S*,8*R*,11*S*) 1,*N*<sup>2</sup>-Deoxyguanosine Adduct When Mismatched with Deoxyadenosine in DNA**

**Revised Manuscript**

**Supporting Information**

Hai Huang, Hao Wang, R. Stephen Lloyd<sup>‡</sup>, Carmelo J. Rizzo, and Michael P. Stone\*

Department of Chemistry, Center in Molecular Toxicology, Center for Structural Biology and Vanderbilt-Ingram Cancer Center, Vanderbilt University, Nashville, Tennessee 37235

<sup>‡</sup>Center for Research in Occupational and Environmental Toxicology, Oregon Health and Science University, 3181 SW Sam Jackson Park Road, L606, Portland, Oregon 97239-3098

\*To whom correspondence should be addressed. Tel: 615-322-2589; Fax: 615-322-7591; E-mail: michael.p.stone@vanderbilt.edu.

Abbreviations: HNE, *trans*-4-hydroxynonenal; 1,*N*<sup>2</sup>-HNE-dG, HNE derived 1,*N*<sup>2</sup>-2'-deoxyguanosine adduct; PdG, 1,*N*<sup>2</sup>-propano-2'-deoxyguanosine; M<sub>1</sub>dG, 3-(2'-deoxy-β-D-erythro-pentofuranosyl)pyrimido[1,2-α]purin-10(3*H*)-one; NOESY, nuclear Overhauser effect spectroscopy; COSY, correlation spectroscopy; TOCSY, total correlation spectroscopy; DQF-COSY, double-quantum filtered COSY; NOE, nuclear Overhauser effect; rMD, restrained molecular dynamics

**Table S1.** Chemical shifts of the mismatched duplex at pH 5.5.

**Table S2.** Chemical shifts of the mismatched duplex at pH 8.9.

**Table S3.** NOE restraints utilized in the rMD calculation at pH 5.5.

**Table S4.** NOE restraints utilized in the rMD calculation at pH 8.9.

**Table S5.** Torsion angles of the rMD structure at pH 5.5.

**Table S6.** Torsion angles of the rMD structure at pH 8.9.

**Figure S1.** Force field parameters for the HNE-dG adduct.

**Figure S2.**  $^1\text{H}$  NMRs of the mismatched 5'-CpX-3' duplex at different pHs.

**Figure S3.** Exchange NOE interactions of the two sets of resonances at pH 7.3.

**Figure S4.** NOE crosspeaks of the imino protons at pH 5.5 and 8.9.

**Figure S5.** Some NOE crosspeaks of the protonated A<sup>18</sup> and C<sup>6</sup> amino protons at pH 5.5.

**Figure S6.** NOE crosspeaks associated with HNE protons at pH 5.5 and 8.9.

**Figure S7.** Chemical shift perturbations of the mismatched duplex at pH 8.9.

**Figure S8.** Chemical shift comparisons of the mismatched duplex at pH 5.5 and 8.9.

**Figure S9.** Residue-by-residue sixth root residuals ( $R_1^X$ ) at pH 5.5 and 8.9.

**Figure S10.** CPK models of average structures of the mismatched 5'-CpX-3' duplex at pH 5.5 and 8.9.

**Table S1.** Chemical shifts of the mismatched duplex at pH 5.5.

| Residue         | H6/H8 | H2/H5/Me | H1'  | H2'  | H2'' | H3'  |
|-----------------|-------|----------|------|------|------|------|
| G <sup>1</sup>  | 7.94  |          | 5.95 | 2.62 | 2.73 | 4.79 |
| C <sup>2</sup>  | 7.48  | 5.30     | 5.99 | 2.07 | 2.44 | 4.78 |
| T <sup>3</sup>  | 7.38  | 1.61     | 5.44 | 2.10 | 2.35 | 4.81 |
| A <sup>4</sup>  | 8.14  |          | 6.00 | 2.69 | 2.85 | 5.00 |
| G <sup>5</sup>  | 7.64  |          | 5.46 | 2.43 | 2.47 | 4.99 |
| C <sup>6</sup>  | 7.23  | 5.18     | 5.74 | 1.58 | 2.52 | 4.72 |
| X <sup>7</sup>  | 7.37  |          | 5.46 | 3.04 | 2.27 | 4.77 |
| A <sup>8</sup>  | 8.22  | 7.69     | 5.95 | 2.67 | 2.79 | 4.99 |
| G <sup>9</sup>  | 7.54  |          | 5.75 | 2.46 | 2.62 | 4.79 |
| T <sup>10</sup> | 7.18  | 1.17     | 5.94 | 2.06 | 2.41 | 4.76 |
| C <sup>11</sup> | 7.54  | 5.61     | 5.98 | 2.15 | 2.43 | 4.76 |
| C <sup>12</sup> | 7.60  | 5.68     | 6.17 | 2.21 | 2.24 | 4.51 |
| G <sup>13</sup> | 7.81  |          | 5.59 | 2.45 | 2.63 | 4.77 |
| G <sup>14</sup> | 7.78  |          | 5.52 | 2.64 | 2.72 | 4.97 |
| A <sup>15</sup> | 8.16  | 7.82     | 6.21 | 2.68 | 2.87 | 5.00 |
| C <sup>16</sup> | 7.20  | 5.12     | 5.73 | 1.84 | 2.36 | 4.65 |
| T <sup>17</sup> | 7.41  | 1.55     | 5.39 | 2.13 | 2.44 | 4.79 |
| A <sup>18</sup> | 8.42  | 7.04     | 6.06 | 2.77 | 2.94 | 5.03 |
| G <sup>19</sup> | 7.74  |          | 5.76 | 2.52 | 2.63 | 4.95 |
| C <sup>20</sup> | 7.29  | 5.22     | 5.75 | 1.88 | 2.35 | 4.65 |
| T <sup>21</sup> | 7.33  | 1.57     | 5.41 | 2.06 | 2.32 | 4.78 |
| A <sup>22</sup> | 8.16  |          | 5.96 | 2.68 | 2.83 | 4.96 |
| G <sup>23</sup> | 7.64  |          | 5.73 | 2.41 | 2.58 | 4.89 |
| C <sup>24</sup> | 7.30  | 5.24     | 6.03 | 2.09 | 2.09 | 4.40 |

**Table S2.** Chemical shifts of the mismatched duplex at pH 8.9.

| Residue         | H6/H8 | H2/H5/Me | H1'  | H2'  | H2'' | H3'  |
|-----------------|-------|----------|------|------|------|------|
| G <sup>1</sup>  | 7.94  |          | 5.95 | 2.62 | 2.74 | 4.79 |
| C <sup>2</sup>  | 7.48  | 5.30     | 6.01 | 2.07 | 2.45 | 4.77 |
| T <sup>3</sup>  | 7.37  | 1.60     | 5.44 | 2.11 | 2.35 | 4.81 |
| A <sup>4</sup>  | 8.14  | 7.40     | 6.00 | 2.69 | 2.84 | 5.00 |
| G <sup>5</sup>  | 7.64  |          | 5.56 | 2.43 | 2.53 | 4.92 |
| C <sup>6</sup>  | 7.28  | 5.32     | 5.84 | 1.96 | 2.22 | 4.75 |
| X <sup>7</sup>  | 7.59  |          | 5.38 | 2.31 | 2.56 | 4.77 |
| A <sup>8</sup>  | 8.13  | 7.89     | 5.78 | 2.68 | 2.69 | 4.96 |
| G <sup>9</sup>  | 7.57  |          | 5.86 | 2.46 | 2.66 | 4.80 |
| T <sup>10</sup> | 7.24  | 1.19     | 6.01 | 2.11 | 2.47 | 4.81 |
| C <sup>11</sup> | 7.54  | 5.63     | 5.98 | 2.15 | 2.42 | 4.78 |
| C <sup>12</sup> | 7.59  | 5.70     | 6.18 | 2.22 | 2.22 | 4.51 |
| G <sup>13</sup> | 7.81  |          | 5.60 | 2.47 | 2.66 | 4.77 |
| G <sup>14</sup> | 7.79  |          | 5.54 | 2.66 | 2.74 | 4.98 |
| A <sup>15</sup> | 8.16  | 7.86     | 6.22 | 2.69 | 2.87 | 5.01 |
| C <sup>16</sup> | 7.18  | 5.12     | 5.73 | 1.78 | 2.32 | 4.66 |
| T <sup>17</sup> | 6.90  | 1.55     | 5.84 | 1.10 | 1.65 | 4.63 |
| A <sup>18</sup> | 8.19  | 7.37     | 5.79 | 2.60 | 2.66 | 4.94 |
| G <sup>19</sup> | 7.89  |          | 5.86 | 2.63 | 2.71 | 4.93 |
| C <sup>20</sup> | 7.29  | 5.26     | 5.77 | 1.89 | 2.36 | 4.67 |
| T <sup>21</sup> | 7.33  | 1.57     | 5.42 | 2.07 | 2.33 | 4.79 |
| A <sup>22</sup> | 8.17  | 7.39     | 6.00 | 2.70 | 2.84 | 5.01 |
| G <sup>23</sup> | 7.65  |          | 5.73 | 2.43 | 2.58 | 4.90 |
| C <sup>24</sup> | 7.32  | 5.26     | 6.04 | 2.06 | 2.13 | 4.40 |

**Table S3.** NOE restraints utilized in the rMD calculation at pH 5.5.

| Residue I<br>No. | Residue I<br>Name | Atom I<br>Name | Residue II<br>No. | Residue II<br>Name | Atom II<br>Name | Lower<br>bond | Upper<br>bond |
|------------------|-------------------|----------------|-------------------|--------------------|-----------------|---------------|---------------|
| 1                | DG5               | H3'            | 1                 | DG5                | H8              | 3.71          | 5.87          |
| 2                | DC                | H6             | 1                 | DG5                | H8              | 3.47          | 5.39          |
| 2                | DC                | H5             | 1                 | DG5                | H8              | 3.78          | 5.12          |
| 2                | DC                | H2'            | 2                 | DC                 | H5              | 3.32          | 4.32          |
| 3                | DT                | M7             | 2                 | DC                 | H5              | 2.31          | 3.13          |
| 8                | DA                | H8             | 7                 | DGH                | H2'             | 4.50          | 5.50          |
| 9                | DG                | H1'            | 8                 | DA                 | H2              | 3.88          | 5.18          |
| 9                | DG                | H8             | 8                 | DA                 | H8              | 3.93          | 5.31          |
| 10               | DT                | M7             | 9                 | DG                 | H1'             | 3.81          | 5.15          |
| 10               | DT                | M7             | 9                 | DG                 | H8              | 2.30          | 3.10          |
| 10               | DT                | H2'            | 10                | DT                 | M7              | 3.65          | 4.95          |
| 11               | DC                | H5             | 10                | DT                 | H6              | 3.39          | 4.59          |
| 11               | DC                | H5             | 10                | DT                 | M7              | 3.77          | 5.11          |
| 12               | DC3               | H6             | 12                | DC3                | H1'             | 2.85          | 3.75          |
| 12               | DC3               | H5             | 12                | DC3                | H1'             | 4.03          | 5.45          |
| 12               | DC3               | H3'            | 12                | DC3                | H1'             | 2.88          | 3.80          |
| 15               | DA                | H8             | 15                | DA                 | H1'             | 2.95          | 3.89          |
| 15               | DA                | H2             | 15                | DA                 | H1'             | 4.27          | 5.77          |
| 15               | DA                | H3'            | 15                | DA                 | H1'             | 3.03          | 3.97          |
| 15               | DA                | H2'            | 15                | DA                 | H1'             | 2.33          | 3.09          |
| 15               | DA                | H2''           | 15                | DA                 | H1'             | 2.13          | 2.87          |
| 16               | DC                | H1'            | 15                | DA                 | H1'             | 3.28          | 4.44          |

|    |     |      |    |     |      |      |      |
|----|-----|------|----|-----|------|------|------|
| 16 | DC  | H1'  | 15 | DA  | H2   | 2.62 | 3.54 |
| 16 | DC  | H6   | 15 | DA  | H1'  | 2.55 | 3.45 |
| 16 | DC  | H6   | 15 | DA  | H8   | 3.86 | 4.89 |
| 16 | DC  | H6   | 15 | DA  | H3'  | 3.96 | 5.12 |
| 16 | DC  | H6   | 15 | DA  | H2'' | 2.02 | 2.84 |
| 16 | DC  | H5   | 15 | DA  | H1'  | 3.53 | 4.57 |
| 16 | DC  | H5   | 15 | DA  | H8   | 2.76 | 3.74 |
| 16 | DC  | H5   | 15 | DA  | H2'  | 3.09 | 4.57 |
| 16 | DC  | H5   | 15 | DA  | H2'' | 2.97 | 4.01 |
| 16 | DC  | H3'  | 15 | DA  | H1'  | 3.33 | 5.05 |
| 16 | DC  | H3'  | 16 | DC  | H5   | 4.53 | 6.37 |
| 16 | DC  | H2'  | 15 | DA  | H1'  | 3.72 | 4.91 |
| 16 | DC  | H2'  | 15 | DA  | H8   | 4.86 | 6.48 |
| 16 | DC  | H2'  | 16 | DC  | H6   | 2.00 | 2.78 |
| 16 | DC  | H2'  | 16 | DC  | H5   | 3.24 | 4.28 |
| 16 | DC  | H2'' | 16 | DC  | H5   | 4.22 | 5.34 |
| 17 | DT  | H6   | 16 | DC  | H3'  | 4.53 | 5.76 |
| 17 | DT  | H6   | 16 | DC  | H2'  | 2.67 | 4.25 |
| 17 | DT  | M7   | 16 | DC  | H5   | 2.42 | 3.08 |
| 18 | DAP | H2   | 8  | DA  | H2   | 3.50 | 4.50 |
| 18 | DAP | H3'  | 18 | DAP | H8   | 3.04 | 4.00 |
| 18 | DAP | H2'  | 18 | DAP | H8   | 1.84 | 2.50 |
| 18 | DAP | H2'' | 18 | DAP | H8   | 2.83 | 3.63 |
| 19 | DG  | H8   | 18 | DAP | H8   | 3.33 | 4.37 |
| 19 | DG  | H8   | 18 | DAP | H2'' | 2.10 | 2.90 |
| 20 | DC  | H6   | 19 | DG  | H3'  | 3.17 | 7.25 |

|    |     |      |    |     |     |      |      |
|----|-----|------|----|-----|-----|------|------|
| 20 | DC  | H5   | 19 | DG  | H8  | 3.67 | 4.85 |
| 20 | DC  | H2'  | 20 | DC  | H5  | 2.51 | 4.95 |
| 21 | DT  | M7   | 20 | DC  | H5  | 2.80 | 3.48 |
| 25 | HNE | H1   | 6  | DC  | H5  | 2.41 | 2.95 |
| 25 | HNE | H22  | 6  | DC  | H5  | 3.16 | 4.28 |
| 25 | HNE | H3   | 6  | DC  | H6  | 4.16 | 5.52 |
| 25 | HNE | H3   | 25 | HNE | H22 | 2.30 | 3.73 |
| 25 | HNE | H4   | 6  | DC  | H6  | 4.26 | 5.66 |
| 25 | HNE | H4   | 25 | HNE | H22 | 2.33 | 3.27 |
| 1  | DG5 | H1'  | 1  | DG5 | H8  | 3.47 | 4.31 |
| 1  | DG5 | H1'  | 2  | DC  | H5  | 3.22 | 4.36 |
| 2  | DC  | H1'  | 2  | DC  | H5  | 4.09 | 5.43 |
| 2  | DC  | H1'  | 3  | DT  | M7  | 3.93 | 4.95 |
| 5  | DG  | H1'  | 6  | DC  | H6  | 3.17 | 5.25 |
| 5  | DG  | H8   | 6  | DC  | H6  | 4.23 | 5.61 |
| 7  | DGH | H1'  | 7  | DGH | H2' | 2.70 | 3.66 |
| 7  | DGH | H8   | 7  | DGH | H2' | 3.86 | 5.22 |
| 7  | DGH | H8   | 8  | DA  | H2  | 3.15 | 4.27 |
| 8  | DA  | H3'  | 9  | DG  | H8  | 4.76 | 6.44 |
| 10 | DT  | H1'  | 10 | DT  | H6  | 2.84 | 3.70 |
| 10 | DT  | H1'  | 10 | DT  | M7  | 3.93 | 5.13 |
| 9  | DG  | H3'  | 10 | DT  | M7  | 3.19 | 4.31 |
| 9  | DG  | H2'  | 10 | DT  | M7  | 2.69 | 3.63 |
| 9  | DG  | H2'' | 10 | DT  | M7  | 2.87 | 3.89 |
| 11 | DC  | H2'' | 12 | DC3 | H1' | 3.16 | 4.28 |
| 11 | DC  | H3'  | 12 | DC3 | H5  | 4.37 | 5.83 |

|    |     |      |    |     |      |      |      |
|----|-----|------|----|-----|------|------|------|
| 14 | DG  | H1'  | 15 | DA  | H1'  | 4.85 | 6.57 |
| 11 | DC  | H1'  | 15 | DA  | H2   | 3.03 | 4.03 |
| 17 | DT  | H1'  | 18 | DAP | H8   | 4.22 | 6.20 |
| 18 | DAP | H1'  | 18 | DAP | H8   | 2.92 | 3.96 |
| 18 | DAP | H1'  | 19 | DG  | H8   | 2.52 | 3.40 |
| 23 | DG  | H1'  | 23 | DG  | H3'  | 3.43 | 4.63 |
| 24 | DC3 | H1'  | 24 | DC3 | H5   | 4.65 | 6.54 |
| 2  | DC  | H5   | 1  | DG5 | H2'  | 2.68 | 3.62 |
| 2  | DC  | H5   | 1  | DG5 | H2'' | 2.69 | 3.65 |
| 3  | DT  | H6   | 2  | DC  | H1'  | 2.90 | 3.76 |
| 5  | DG  | H2'  | 5  | DG  | H3'  | 2.28 | 3.26 |
| 9  | DG  | H8   | 8  | DA  | H2'' | 2.01 | 2.71 |
| 16 | DC  | H5   | 16 | DC  | H1'  | 4.00 | 5.40 |
| 19 | DG  | H8   | 18 | DAP | H3'  | 4.29 | 6.47 |
| 23 | DG  | H2'' | 23 | DG  | H8   | 3.01 | 3.73 |
| 24 | DC3 | H6   | 23 | DG  | H8   | 3.57 | 4.69 |
| 24 | DC3 | H5   | 23 | DG  | H8   | 3.29 | 4.45 |
| 24 | DC3 | H5   | 23 | DG  | H2'  | 4.23 | 6.51 |
| 24 | DC3 | H3'  | 24 | DC3 | H6   | 3.02 | 3.90 |
| 25 | HNE | Q5   | 25 | HNE | H3   | 2.00 | 3.00 |
| 25 | HNE | Q5   | 25 | HNE | H4   | 2.72 | 3.86 |
| 1  | DG5 | H8   | 1  | DG5 | H2'  | 2.08 | 2.82 |
| 1  | DG5 | H8   | 1  | DG5 | H2'' | 2.77 | 3.57 |
| 1  | DG5 | H1'  | 2  | DC  | H1'  | 3.27 | 4.43 |
| 2  | DC  | H6   | 2  | DC  | H2'  | 2.01 | 2.71 |
| 2  | DC  | H6   | 3  | DT  | M7   | 2.81 | 3.81 |



|    |     |      |    |     |      |      |      |
|----|-----|------|----|-----|------|------|------|
| 5  | DG  | H1'  | 5  | DG  | H8   | 3.87 | 4.85 |
| 5  | DG  | H1'  | 5  | DG  | H3'  | 3.41 | 4.55 |
| 7  | DGH | H2'' | 8  | DA  | H8   | 3.50 | 4.50 |
| 7  | DGH | H1'  | 8  | DA  | H2'  | 2.96 | 5.20 |
| 9  | DG  | H1'  | 9  | DG  | H3'  | 2.86 | 3.86 |
| 10 | DT  | H6   | 10 | DT  | H2'  | 2.11 | 2.85 |
| 10 | DT  | H1'  | 11 | DC  | H5   | 3.15 | 4.27 |
| 11 | DC  | H3'  | 12 | DC3 | H6   | 3.44 | 4.29 |
| 14 | DG  | H1'  | 15 | DA  | H8   | 2.53 | 3.43 |
| 15 | DA  | H2'' | 16 | DC  | H1'  | 3.96 | 5.18 |
| 16 | DC  | H6   | 16 | DC  | H3'  | 3.64 | 5.25 |
| 7  | DGH | H8   | 18 | DAP | H2   | 2.47 | 3.33 |
| 18 | DAP | H1'  | 18 | DAP | H3'  | 3.14 | 4.24 |
| 18 | DAP | H1'  | 18 | DAP | H2'' | 2.11 | 2.85 |
| 18 | DAP | H1'  | 19 | DG  | H3'  | 4.38 | 5.80 |
| 19 | DG  | H1'  | 19 | DG  | H8   | 2.95 | 3.89 |
| 21 | DT  | H6   | 21 | DT  | H3'  | 3.36 | 4.41 |
| 23 | DG  | H1'  | 23 | DG  | H8   | 2.87 | 3.89 |
| 24 | DC3 | H1'  | 24 | DC3 | H6   | 2.69 | 3.65 |
| 25 | HNE | H1   | 25 | HNE | H3   | 3.24 | 4.38 |
| 25 | HNE | H1   | 25 | HNE | H4   | 3.84 | 4.68 |
| 2  | DC  | H6   | 1  | DG5 | H2'' | 2.29 | 3.21 |
| 2  | DC  | H2'' | 2  | DC  | H6   | 2.88 | 3.66 |
| 3  | DT  | M7   | 2  | DC  | H2'' | 2.91 | 3.93 |
| 6  | DC  | H3'  | 6  | DC  | H6   | 3.60 | 4.88 |
| 6  | DC  | H2'  | 6  | DC  | H3'  | 2.19 | 2.97 |

|    |     |      |    |     |      |      |      |
|----|-----|------|----|-----|------|------|------|
| 6  | DC  | H2'' | 6  | DC  | H3'  | 2.11 | 2.85 |
| 19 | DG  | H1'  | 18 | DAP | H2   | 3.42 | 4.52 |
| 19 | DG  | H2'  | 19 | DG  | H3'  | 2.27 | 3.07 |
| 20 | DC  | H3'  | 20 | DC  | H6   | 2.87 | 3.89 |
| 20 | DC  | H2'  | 20 | DC  | H6   | 2.03 | 2.75 |
| 21 | DT  | H6   | 20 | DC  | H2'  | 3.04 | 3.66 |
| 25 | HNE | H1   | 6  | DC  | H6   | 2.49 | 3.51 |
| 25 | HNE | H21  | 6  | DC  | H5   | 3.50 | 4.50 |
| 25 | HNE | H22  | 25 | HNE | H1   | 2.20 | 2.98 |
| 25 | HNE | H4   | 6  | DC  | H3'  | 3.43 | 4.71 |
| 25 | HNE | Q5   | 25 | HNE | H1   | 4.43 | 5.93 |
| 25 | HNE | Q6   | 25 | HNE | H22  | 4.08 | 5.02 |
| 25 | HNE | Q8   | 6  | DC  | H3'  | 3.71 | 5.01 |
| 25 | HNE | Q8   | 25 | HNE | H4   | 2.58 | 3.66 |
| 25 | HNE | M9   | 25 | HNE | Q8   | 2.55 | 3.45 |
| 1  | DG5 | H3'  | 1  | DG5 | H2'' | 2.04 | 2.76 |
| 1  | DG5 | H2'  | 2  | DC  | H6   | 2.86 | 3.76 |
| 2  | DC  | H3'  | 3  | DT  | M7   | 3.33 | 4.51 |
| 6  | DC  | H1'  | 6  | DC  | H6   | 3.10 | 4.34 |
| 6  | DC  | H1'  | 6  | DC  | H2'  | 2.47 | 3.00 |
| 6  | DC  | H1'  | 25 | HNE | H22  | 3.34 | 4.44 |
| 5  | DG  | H8   | 6  | DC  | H5   | 4.12 | 5.72 |
| 10 | DT  | H6   | 10 | DT  | H3'  | 3.26 | 4.24 |
| 11 | DC  | H1'  | 12 | DC3 | H6   | 2.89 | 3.77 |
| 11 | DC  | H1'  | 12 | DC3 | H5   | 3.93 | 5.31 |
| 11 | DC  | H2'' | 12 | DC3 | H6   | 1.98 | 2.68 |

|    |     |     |    |     |      |      |      |
|----|-----|-----|----|-----|------|------|------|
| 13 | DG5 | H1' | 13 | DG5 | H3'  | 3.13 | 3.93 |
| 13 | DG5 | H1' | 13 | DG5 | H2'' | 1.82 | 2.46 |
| 14 | DG  | H1' | 14 | DG  | H8   | 3.54 | 4.78 |
| 14 | DG  | H1' | 14 | DG  | H2'  | 2.26 | 2.96 |
| 14 | DG  | H1' | 14 | DG  | H2'' | 2.12 | 2.86 |
| 16 | DC  | H1' | 16 | DC  | H3'  | 2.92 | 3.84 |
| 7  | DGH | H1' | 18 | DAP | H2   | 3.48 | 4.60 |
| 18 | DAP | H1' | 18 | DAP | H2'  | 2.34 | 3.00 |
| 18 | DAP | H3' | 18 | DAP | H2'' | 2.62 | 3.35 |
| 19 | DG  | H8  | 19 | DG  | H3'  | 3.24 | 4.24 |
| 23 | DG  | H1' | 24 | DC3 | H1'  | 3.16 | 4.20 |
| 24 | DC3 | H5  | 24 | DC3 | H2'  | 3.87 | 5.45 |
| 25 | HNE | H3  | 25 | HNE | Q8   | 3.83 | 5.03 |
| 2  | DC  | H3' | 2  | DC  | H6   | 2.88 | 3.90 |
| 6  | DC  | H2' | 6  | DC  | H5   | 3.22 | 4.28 |
| 8  | DA  | H3' | 8  | DA  | H8   | 3.39 | 4.33 |
| 11 | DC  | H6  | 10 | DT  | H2'  | 3.12 | 3.85 |
| 11 | DC  | H5  | 10 | DT  | H2'  | 2.52 | 3.40 |
| 12 | DC3 | H6  | 11 | DC  | H2'  | 2.31 | 3.27 |
| 12 | DC3 | H5  | 11 | DC  | H2'  | 2.89 | 3.91 |
| 19 | DG  | H2' | 19 | DG  | H8   | 2.34 | 3.16 |
| 25 | HNE | H22 | 25 | HNE | H21  | 1.59 | 2.27 |
| 1  | DG5 | H1' | 2  | DC  | H6   | 2.33 | 3.15 |
| 2  | DC  | H1' | 2  | DC  | H6   | 3.04 | 4.12 |
| 2  | DC  | H1' | 2  | DC  | H2'  | 2.46 | 3.12 |
| 3  | DT  | H3' | 3  | DT  | H2'' | 2.82 | 3.83 |

|    |     |      |    |     |      |      |      |
|----|-----|------|----|-----|------|------|------|
| 5  | DG  | H3'  | 5  | DG  | H2'' | 2.79 | 6.01 |
| 6  | DC  | H1'  | 6  | DC  | H5   | 4.67 | 6.33 |
| 6  | DC  | H1'  | 6  | DC  | H3'  | 3.06 | 4.14 |
| 6  | DC  | H6   | 6  | DC  | H2'' | 2.40 | 3.38 |
| 6  | DC  | H6   | 25 | HNE | H21  | 2.87 | 3.89 |
| 6  | DC  | H6   | 25 | HNE | H22  | 2.74 | 3.84 |
| 7  | DGH | H1'  | 8  | DA  | H8   | 3.50 | 4.50 |
| 9  | DG  | H1'  | 9  | DG  | H8   | 2.82 | 3.82 |
| 10 | DT  | H1'  | 10 | DT  | H2'  | 2.34 | 2.98 |
| 11 | DC  | H1'  | 11 | DC  | H2'  | 2.27 | 2.97 |
| 11 | DC  | H1'  | 12 | DC3 | H2'  | 3.14 | 4.14 |
| 11 | DC  | H2'' | 12 | DC3 | H5   | 3.33 | 4.33 |
| 13 | DG5 | H1'  | 13 | DG5 | H2'  | 2.43 | 3.11 |
| 14 | DG  | H8   | 14 | DG  | H3'  | 3.90 | 5.28 |
| 14 | DG  | H8   | 14 | DG  | H2'' | 3.00 | 3.64 |
| 16 | DC  | H1'  | 16 | DC  | H2'  | 2.40 | 3.10 |
| 16 | DC  | H1'  | 17 | DT  | H6   | 3.79 | 5.13 |
| 16 | DC  | H6   | 16 | DC  | H2'' | 2.73 | 3.63 |
| 17 | DT  | H1'  | 17 | DT  | H2'' | 2.17 | 2.93 |
| 18 | DAP | H1'  | 19 | DG  | H1'  | 3.43 | 4.65 |
| 18 | DAP | H2'  | 19 | DG  | H8   | 2.81 | 3.49 |
| 20 | DC  | H1'  | 20 | DC  | H2'  | 2.31 | 3.13 |
| 21 | DT  | H3'  | 21 | DT  | H2'' | 2.82 | 3.63 |
| 24 | DC3 | H1'  | 24 | DC3 | H2'  | 2.26 | 3.06 |
| 24 | DC3 | H1'  | 24 | DC3 | H2'' | 1.90 | 2.58 |
| 24 | DC3 | H3'  | 24 | DC3 | H2'  | 2.14 | 3.00 |

|    |     |      |    |     |      |      |      |
|----|-----|------|----|-----|------|------|------|
| 24 | DC3 | H3'  | 24 | DC3 | H2'' | 2.60 | 3.58 |
| 24 | DC3 | H5   | 24 | DC3 | H2'' | 4.01 | 5.31 |
| 25 | HNE | H1   | 25 | HNE | H21  | 2.23 | 3.01 |
| 25 | HNE | H3   | 25 | HNE | Q6   | 3.75 | 5.07 |
| 25 | HNE | H4   | 25 | HNE | Q6   | 3.12 | 4.04 |
| 1  | DG5 | H2'  | 1  | DG5 | H3'  | 1.95 | 2.63 |
| 2  | DC  | H6   | 1  | DG5 | H3'  | 3.92 | 5.16 |
| 2  | DC  | H2'  | 2  | DC  | H3'  | 1.97 | 2.67 |
| 2  | DC  | H2'' | 2  | DC  | H3'  | 2.12 | 2.88 |
| 3  | DT  | H6   | 2  | DC  | H2'  | 2.71 | 3.37 |
| 3  | DT  | H6   | 2  | DC  | H2'' | 2.00 | 3.00 |
| 3  | DT  | M7   | 2  | DC  | H2'  | 2.66 | 3.60 |
| 3  | DT  | H3'  | 3  | DT  | H6   | 3.21 | 4.35 |
| 3  | DT  | H2'  | 3  | DT  | M7   | 3.17 | 4.29 |
| 3  | DT  | H2'  | 3  | DT  | H3'  | 2.32 | 3.20 |
| 4  | DA  | H8   | 3  | DT  | H2'  | 3.25 | 4.49 |
| 4  | DA  | H8   | 3  | DT  | H2'' | 2.76 | 3.74 |
| 4  | DA  | H2'  | 4  | DA  | H8   | 2.27 | 3.07 |
| 4  | DA  | H2'  | 4  | DA  | H3'  | 2.38 | 3.22 |
| 4  | DA  | H2'' | 4  | DA  | H8   | 2.65 | 3.59 |
| 4  | DA  | H2'' | 4  | DA  | H3'  | 2.62 | 3.54 |
| 5  | DG  | H8   | 4  | DA  | H2'  | 3.01 | 4.07 |
| 5  | DG  | H8   | 4  | DA  | H2'' | 2.59 | 3.51 |
| 5  | DG  | H3'  | 5  | DG  | H8   | 3.40 | 4.12 |
| 5  | DG  | H2'  | 5  | DG  | H8   | 2.27 | 3.07 |
| 6  | DC  | H6   | 5  | DG  | H2'  | 2.91 | 3.93 |

|    |    |      |    |    |      |      |      |
|----|----|------|----|----|------|------|------|
| 6  | DC | H6   | 5  | DG | H2'' | 2.35 | 3.29 |
| 6  | DC | H5   | 5  | DG | H2'  | 3.11 | 4.21 |
| 6  | DC | H5   | 5  | DG | H2'' | 2.83 | 3.83 |
| 6  | DC | H2'  | 6  | DC | H6   | 2.05 | 2.77 |
| 6  | DC | H2'' | 6  | DC | H5   | 3.99 | 5.21 |
| 8  | DA | H2'  | 8  | DA | H3'  | 1.86 | 2.52 |
| 8  | DA | H2'' | 8  | DA | H8   | 2.59 | 3.33 |
| 8  | DA | H2'' | 8  | DA | H3'  | 2.78 | 3.76 |
| 9  | DG | H8   | 8  | DA | H2'  | 2.83 | 3.60 |
| 9  | DG | H2'  | 9  | DG | H8   | 2.37 | 3.27 |
| 9  | DG | H2'  | 9  | DG | H3'  | 2.10 | 2.84 |
| 9  | DG | H2'' | 9  | DG | H8   | 2.87 | 3.89 |
| 9  | DG | H2'' | 9  | DG | H3'  | 2.34 | 3.16 |
| 10 | DT | H6   | 9  | DG | H8   | 3.59 | 4.71 |
| 10 | DT | H6   | 9  | DG | H3'  | 3.52 | 4.76 |
| 10 | DT | H6   | 9  | DG | H2'  | 2.90 | 3.76 |
| 10 | DT | H6   | 9  | DG | H2'' | 2.33 | 3.33 |
| 10 | DT | H2'  | 10 | DT | H3'  | 1.90 | 2.56 |
| 10 | DT | H2'' | 10 | DT | H6   | 2.62 | 3.54 |
| 10 | DT | H2'' | 10 | DT | H3'  | 2.29 | 2.95 |
| 11 | DC | H6   | 10 | DT | H6   | 3.82 | 5.00 |
| 11 | DC | H6   | 10 | DT | H2'' | 2.01 | 2.83 |
| 11 | DC | H5   | 10 | DT | H2'' | 2.45 | 3.31 |
| 11 | DC | H3'  | 11 | DC | H6   | 2.96 | 4.00 |
| 11 | DC | H3'  | 11 | DC | H5   | 4.77 | 6.25 |
| 11 | DC | H2'  | 11 | DC | H3'  | 2.14 | 2.90 |

|    |     |      |    |     |      |      |      |
|----|-----|------|----|-----|------|------|------|
| 11 | DC  | H2'' | 11 | DC  | H6   | 2.79 | 3.49 |
| 11 | DC  | H2'' | 11 | DC  | H3'  | 2.36 | 2.99 |
| 12 | DC3 | H6   | 11 | DC  | H5   | 4.00 | 5.00 |
| 12 | DC3 | H5   | 11 | DC  | H6   | 3.43 | 4.65 |
| 12 | DC3 | H2'  | 11 | DC  | H6   | 4.50 | 5.50 |
| 12 | DC3 | H2'  | 12 | DC3 | H6   | 2.07 | 2.97 |
| 12 | DC3 | H2'  | 12 | DC3 | H5   | 3.21 | 4.33 |
| 12 | DC3 | H2'' | 12 | DC3 | H6   | 2.62 | 3.54 |
| 12 | DC3 | H2'' | 12 | DC3 | H5   | 3.63 | 4.73 |
| 13 | DG5 | H2'  | 13 | DG5 | H8   | 2.79 | 3.77 |
| 13 | DG5 | H2'  | 13 | DG5 | H3'  | 1.81 | 2.45 |
| 13 | DG5 | H2'' | 13 | DG5 | H3'  | 2.46 | 3.32 |
| 14 | DG  | H8   | 13 | DG5 | H2'  | 2.96 | 4.00 |
| 14 | DG  | H8   | 13 | DG5 | H2'' | 2.37 | 2.99 |
| 14 | DG  | H2'  | 14 | DG  | H8   | 2.06 | 2.78 |
| 15 | DA  | H8   | 14 | DG  | H2'  | 2.69 | 3.63 |
| 15 | DA  | H8   | 14 | DG  | H2'' | 2.30 | 3.12 |
| 15 | DA  | H2'  | 15 | DA  | H8   | 1.97 | 2.54 |
| 15 | DA  | H2'  | 15 | DA  | H3'  | 2.33 | 3.25 |
| 15 | DA  | H2'' | 15 | DA  | H8   | 2.89 | 3.85 |
| 15 | DA  | H2'' | 15 | DA  | H3'  | 2.13 | 2.89 |
| 16 | DC  | H6   | 15 | DA  | H2'  | 3.10 | 3.87 |
| 17 | DT  | H6   | 16 | DC  | H6   | 3.69 | 4.93 |
| 17 | DT  | H6   | 16 | DC  | H2'' | 2.40 | 3.24 |
| 17 | DT  | M7   | 16 | DC  | H6   | 2.48 | 3.36 |
| 17 | DT  | M7   | 16 | DC  | H2'  | 2.83 | 3.83 |

|    |    |      |    |    |      |      |      |
|----|----|------|----|----|------|------|------|
| 17 | DT | M7   | 16 | DC | H2'' | 2.76 | 3.74 |
| 17 | DT | H2'  | 17 | DT | H6   | 2.28 | 3.08 |
| 17 | DT | H2'  | 17 | DT | M7   | 3.28 | 4.44 |
| 17 | DT | H2'  | 17 | DT | H3'  | 2.35 | 3.17 |
| 17 | DT | H2'' | 17 | DT | H6   | 2.86 | 3.80 |
| 17 | DT | H2'' | 17 | DT | H3'  | 2.17 | 2.79 |
| 20 | DC | H6   | 19 | DG | H2'  | 2.75 | 3.65 |
| 20 | DC | H6   | 19 | DG | H2'' | 2.19 | 3.15 |
| 20 | DC | H5   | 19 | DG | H2'' | 2.87 | 3.89 |
| 20 | DC | H2'' | 20 | DC | H6   | 2.86 | 3.76 |
| 21 | DT | H6   | 20 | DC | H2'' | 2.27 | 3.15 |
| 21 | DT | M7   | 20 | DC | H6   | 2.32 | 3.14 |
| 21 | DT | M7   | 20 | DC | H2'  | 2.42 | 3.28 |
| 21 | DT | M7   | 20 | DC | H2'' | 2.90 | 3.92 |
| 21 | DT | M7   | 21 | DT | H1'  | 4.09 | 5.08 |
| 21 | DT | H3'  | 21 | DT | H1'  | 3.37 | 4.55 |
| 21 | DT | H3'  | 21 | DT | M7   | 4.07 | 5.41 |
| 21 | DT | H2'  | 21 | DT | H1'  | 2.60 | 3.52 |
| 21 | DT | H2'  | 21 | DT | M7   | 3.00 | 4.06 |
| 21 | DT | H2'  | 21 | DT | H3'  | 2.05 | 2.77 |
| 21 | DT | H2'' | 21 | DT | H1'  | 1.88 | 2.54 |
| 21 | DT | H2'' | 21 | DT | H6   | 2.65 | 3.47 |
| 22 | DA | H8   | 21 | DT | H1'  | 2.96 | 4.00 |
| 22 | DA | H8   | 21 | DT | H6   | 3.61 | 4.89 |
| 22 | DA | H8   | 21 | DT | H2'  | 3.62 | 4.90 |
| 22 | DA | H8   | 21 | DT | H2'' | 2.23 | 3.27 |



|    |     |      |    |     |      |      |      |
|----|-----|------|----|-----|------|------|------|
| 22 | DA  | H2'  | 22 | DA  | H8   | 2.16 | 2.92 |
| 22 | DA  | H2'  | 22 | DA  | H3'  | 2.42 | 3.00 |
| 22 | DA  | H2'' | 22 | DA  | H8   | 2.70 | 3.66 |
| 22 | DA  | H2'' | 22 | DA  | H3'  | 2.46 | 3.32 |
| 23 | DG  | H8   | 22 | DA  | H8   | 4.05 | 5.35 |
| 23 | DG  | H8   | 22 | DA  | H2'  | 3.05 | 4.13 |
| 23 | DG  | H8   | 22 | DA  | H2'' | 2.50 | 3.38 |
| 23 | DG  | H3'  | 23 | DG  | H8   | 3.45 | 4.51 |
| 23 | DG  | H2'  | 23 | DG  | H8   | 2.19 | 2.97 |
| 24 | DC3 | H6   | 23 | DG  | H2'  | 2.96 | 3.94 |
| 24 | DC3 | H6   | 23 | DG  | H2'' | 2.38 | 3.32 |
| 24 | DC3 | H5   | 23 | DG  | H2'' | 3.10 | 4.20 |
| 24 | DC3 | H2'  | 24 | DC3 | H6   | 2.02 | 2.74 |
| 24 | DC3 | H2'' | 24 | DC3 | H6   | 2.85 | 3.71 |
| 25 | HNE | H1   | 5  | DG  | H2'  | 4.00 | 5.00 |
| 25 | HNE | H1   | 6  | DC  | H2'  | 2.64 | 3.56 |
| 25 | HNE | H21  | 6  | DC  | H3'  | 3.67 | 4.83 |
| 25 | HNE | H22  | 6  | DC  | H3'  | 2.76 | 3.74 |
| 25 | HNE | H3   | 6  | DC  | H3'  | 5.50 | 6.50 |
| 25 | HNE | H3   | 25 | HNE | H21  | 1.98 | 2.68 |
| 25 | HNE | H4   | 25 | HNE | H21  | 1.95 | 2.63 |
| 25 | HNE | Q5   | 6  | DC  | H6   | 4.00 | 5.42 |
| 25 | HNE | Q5   | 6  | DC  | H3'  | 3.75 | 5.83 |
| 25 | HNE | Q5   | 25 | HNE | H22  | 2.87 | 3.89 |
| 25 | HNE | Q6   | 6  | DC  | H3'  | 5.13 | 6.93 |
| 25 | HNE | Q6   | 25 | HNE | H1   | 5.00 | 6.00 |

|    |     |     |    |     |      |      |      |
|----|-----|-----|----|-----|------|------|------|
| 25 | HNE | Q6  | 25 | HNE | Q5   | 2.49 | 3.37 |
| 25 | HNE | Q7  | 6  | DC  | H3'  | 4.35 | 5.89 |
| 25 | HNE | Q7  | 25 | HNE | H3   | 3.24 | 4.28 |
| 25 | HNE | Q7  | 25 | HNE | H4   | 2.75 | 3.73 |
| 25 | HNE | Q7  | 25 | HNE | Q5   | 2.33 | 3.15 |
| 25 | HNE | Q7  | 25 | HNE | Q6   | 2.13 | 2.89 |
| 25 | HNE | Q8  | 25 | HNE | H1   | 4.87 | 6.47 |
| 25 | HNE | Q8  | 25 | HNE | Q5   | 3.06 | 4.14 |
| 25 | HNE | Q8  | 25 | HNE | Q7   | 2.62 | 3.54 |
| 1  | DG5 | H1' | 1  | DG5 | H3'  | 3.01 | 4.07 |
| 1  | DG5 | H1' | 1  | DG5 | H2'  | 2.45 | 3.31 |
| 1  | DG5 | H1' | 1  | DG5 | H2'' | 1.85 | 2.51 |
| 2  | DC  | H1' | 2  | DC  | H2'' | 1.91 | 2.59 |
| 3  | DT  | H1' | 3  | DT  | H3'  | 3.55 | 4.79 |
| 3  | DT  | H1' | 3  | DT  | H2'  | 2.23 | 3.01 |
| 3  | DT  | H1' | 3  | DT  | H2'' | 2.08 | 2.82 |
| 3  | DT  | H1' | 4  | DA  | H8   | 2.97 | 4.03 |
| 4  | DA  | H1' | 4  | DA  | H8   | 3.16 | 4.10 |
| 4  | DA  | H1' | 4  | DA  | H3'  | 2.90 | 3.84 |
| 4  | DA  | H1' | 4  | DA  | H2'  | 2.73 | 3.69 |
| 4  | DA  | H1' | 4  | DA  | H2'' | 2.07 | 2.79 |
| 4  | DA  | H1' | 5  | DG  | H8   | 2.70 | 3.66 |
| 5  | DG  | H1' | 5  | DG  | H2'  | 2.35 | 3.19 |
| 6  | DC  | H1' | 6  | DC  | H2'' | 1.88 | 2.54 |
| 6  | DC  | H1' | 7  | DGH | H8   | 3.50 | 4.50 |
| 6  | DC  | H1' | 25 | HNE | H21  | 5.00 | 6.00 |

|    |     |     |    |     |      |      |      |
|----|-----|-----|----|-----|------|------|------|
| 7  | DGH | H1' | 7  | DGH | H8   | 2.04 | 2.76 |
| 7  | DGH | H1' | 7  | DGH | H3'  | 3.23 | 5.66 |
| 7  | DGH | H1' | 7  | DGH | H2'' | 2.36 | 3.22 |
| 8  | DA  | H1' | 8  | DA  | H8   | 2.95 | 3.99 |
| 8  | DA  | H1' | 8  | DA  | H3'  | 2.95 | 3.99 |
| 8  | DA  | H1' | 8  | DA  | H2'  | 2.42 | 3.28 |
| 8  | DA  | H1' | 8  | DA  | H2'' | 2.04 | 2.76 |
| 9  | DG  | H1' | 9  | DG  | H2'  | 2.39 | 3.23 |
| 9  | DG  | H1' | 9  | DG  | H2'' | 2.35 | 3.19 |
| 9  | DG  | H1' | 10 | DT  | H6   | 3.26 | 4.20 |
| 10 | DT  | H1' | 10 | DT  | H2'' | 2.11 | 2.85 |
| 10 | DT  | H1' | 11 | DC  | H6   | 2.27 | 3.07 |
| 11 | DC  | H1' | 11 | DC  | H6   | 2.87 | 3.67 |
| 11 | DC  | H1' | 11 | DC  | H2'' | 1.94 | 2.62 |
| 12 | DC3 | H1' | 12 | DC3 | H2'  | 2.27 | 3.07 |
| 12 | DC3 | H1' | 12 | DC3 | H2'' | 2.07 | 2.81 |
| 12 | DC3 | H3' | 12 | DC3 | H2'  | 2.10 | 2.98 |
| 12 | DC3 | H3' | 12 | DC3 | H2'' | 2.72 | 3.68 |
| 13 | DG5 | H1' | 13 | DG5 | H8   | 3.13 | 4.23 |
| 13 | DG5 | H1' | 14 | DG  | H8   | 2.90 | 3.92 |
| 14 | DG  | H3' | 14 | DG  | H2'  | 2.14 | 2.90 |
| 14 | DG  | H3' | 14 | DG  | H2'' | 1.95 | 2.65 |
| 16 | DC  | H1' | 16 | DC  | H6   | 2.65 | 3.59 |
| 16 | DC  | H1' | 16 | DC  | H2'' | 2.01 | 2.71 |
| 16 | DC  | H3' | 16 | DC  | H2'  | 2.07 | 2.79 |
| 16 | DC  | H3' | 16 | DC  | H2'' | 2.23 | 3.01 |

|    |     |     |    |     |      |      |      |
|----|-----|-----|----|-----|------|------|------|
| 16 | DC  | H3' | 17 | DT  | M7   | 3.21 | 4.35 |
| 17 | DT  | H1' | 17 | DT  | H6   | 2.87 | 3.81 |
| 17 | DT  | H1' | 17 | DT  | M7   | 3.88 | 5.14 |
| 17 | DT  | H1' | 17 | DT  | H3'  | 3.34 | 4.52 |
| 17 | DT  | H1' | 17 | DT  | H2'  | 2.34 | 3.16 |
| 18 | DAP | H3' | 18 | DAP | H2'  | 2.27 | 3.07 |
| 19 | DG  | H1' | 19 | DG  | H2'  | 2.31 | 3.03 |
| 19 | DG  | H1' | 19 | DG  | H2'' | 2.21 | 3.14 |
| 19 | DG  | H1' | 20 | DC  | H6   | 2.77 | 3.65 |
| 19 | DG  | H1' | 20 | DC  | H5   | 3.28 | 4.44 |
| 19 | DG  | H3' | 19 | DG  | H2'' | 2.02 | 2.74 |
| 20 | DC  | H1' | 20 | DC  | H6   | 2.88 | 3.72 |
| 20 | DC  | H1' | 20 | DC  | H2'' | 2.04 | 2.76 |
| 20 | DC  | H1' | 21 | DT  | H1'  | 3.50 | 4.74 |
| 20 | DC  | H1' | 21 | DT  | H6   | 2.18 | 2.94 |
| 20 | DC  | H1' | 21 | DT  | M7   | 3.50 | 4.74 |
| 20 | DC  | H3' | 20 | DC  | H2'  | 2.05 | 2.77 |
| 20 | DC  | H3' | 20 | DC  | H2'' | 2.23 | 3.01 |
| 20 | DC  | H3' | 21 | DT  | M7   | 3.30 | 4.46 |
| 22 | DA  | H1' | 22 | DA  | H8   | 2.93 | 3.87 |
| 22 | DA  | H1' | 22 | DA  | H2'  | 2.53 | 3.43 |
| 22 | DA  | H1' | 22 | DA  | H2'' | 2.44 | 3.30 |
| 22 | DA  | H1' | 23 | DG  | H8   | 2.82 | 3.72 |
| 23 | DG  | H1' | 23 | DG  | H2'  | 2.31 | 3.03 |
| 23 | DG  | H1' | 23 | DG  | H2'' | 2.07 | 2.79 |
| 23 | DG  | H1' | 24 | DC3 | H6   | 2.75 | 3.65 |

|    |     |     |    |     |     |      |      |
|----|-----|-----|----|-----|-----|------|------|
| 23 | DG  | H1' | 24 | DC3 | H5  | 3.62 | 4.78 |
| 24 | DC3 | H1' | 24 | DC3 | H3' | 3.01 | 3.97 |

M7 represents the methyl group of thymine; DGH represents HNE-dG adduct ( $X^7$ ) without HNE moiety and the atoms are named as regular deoxyguanosine; DAP represents protonated A<sup>18</sup> and the atoms are named as regular deoxyadenosine; HNE moiety is considered as a residue with residue No. 25, the atoms are named as following:  $X^7$  H8: HNE H1;  $X^7$  H7 $\alpha$ ( $\beta$ ): HNE H21(2);  $X^7$  H6: HNE H3;  $X^7$  H11: HNE H4;  $X^7$  H12: HNE Q5;  $X^7$  H13: HNE Q6;  $X^7$  H14: HNE Q7;  $X^7$  H15: HNE Q8;  $X^7$  H16: HNE M9

**Table S4.** NOE restraints utilized in the rMD calculation at pH 8.9.

| Residue I<br>No. | Residue I<br>Name | Atom I<br>Name | Residue II<br>No. | Residue II<br>Name | Atom II<br>Name | Lower<br>bond | Upper<br>bond |
|------------------|-------------------|----------------|-------------------|--------------------|-----------------|---------------|---------------|
| 2                | DC                | H6             | 1                 | DG5                | H8              | 3.57          | 5.78          |
| 2                | DC                | H5             | 1                 | DG5                | H8              | 3.30          | 4.46          |
| 3                | DT                | M7             | 2                 | DC                 | H6              | 2.64          | 3.58          |
| 6                | DC                | H6             | 6                 | DC                 | H2'2            | 2.78          | 3.56          |
| 6                | DC                | H5             | 6                 | DC                 | H2'2            | 3.45          | 5.48          |
| 10               | DT                | M7             | 9                 | DG                 | H2'1            | 2.79          | 3.77          |
| 11               | DC                | H5             | 10                | DT                 | H6              | 3.52          | 4.76          |
| 11               | DC                | H5             | 10                | DT                 | M7              | 3.28          | 4.44          |
| 12               | DC3               | H6             | 12                | DC3                | H3'             | 2.21          | 2.99          |
| 12               | DC3               | H5             | 12                | DC3                | H3'             | 3.84          | 5.20          |
| 15               | DA                | H8             | 14                | DG                 | H8              | 3.55          | 4.45          |
| 16               | DC                | H1'            | 15                | DA                 | H2              | 2.98          | 4.02          |
| 16               | DC                | H2'1           | 16                | DC                 | H1'             | 2.23          | 3.01          |
| 16               | DC                | H3'            | 16                | DC                 | H2'1            | 2.04          | 2.90          |
| 16               | DC                | H6             | 15                | DA                 | H2'1            | 2.63          | 3.55          |
| 16               | DC                | H6             | 15                | DA                 | H2'2            | 2.06          | 2.92          |
| 16               | DC                | H6             | 15                | DA                 | H3'             | 3.43          | 4.63          |
| 16               | DC                | H6             | 15                | DA                 | H8              | 3.54          | 4.72          |
| 16               | DC                | H6             | 16                | DC                 | H1'             | 2.89          | 3.91          |
| 16               | DC                | H6             | 16                | DC                 | H2'1            | 2.05          | 2.87          |
| 16               | DC                | H6             | 16                | DC                 | H3'             | 3.10          | 4.10          |
| 16               | DC                | H5             | 15                | DA                 | H2'1            | 2.87          | 3.87          |
| 16               | DC                | H5             | 15                | DA                 | H2'2            | 3.06          | 4.14          |

|    |     |     |    |     |      |      |      |
|----|-----|-----|----|-----|------|------|------|
| 16 | DC  | H5  | 15 | DA  | H8   | 3.18 | 4.30 |
| 16 | DC  | H5  | 16 | DC  | H2'1 | 3.35 | 4.43 |
| 16 | DC  | H5  | 16 | DC  | H3'  | 5.50 | 6.50 |
| 17 | DT  | H6  | 16 | DC  | H1'  | 3.61 | 4.71 |
| 17 | DT  | H6  | 16 | DC  | H2'1 | 2.89 | 4.01 |
| 17 | DT  | H6  | 16 | DC  | H6   | 4.50 | 5.50 |
| 17 | DT  | M7  | 15 | DA  | H8   | 4.35 | 5.71 |
| 17 | DT  | M7  | 16 | DC  | H6   | 2.52 | 3.40 |
| 17 | DT  | M7  | 16 | DC  | H5   | 2.35 | 3.17 |
| 18 | DA  | H8  | 17 | DT  | H3'  | 5.00 | 6.00 |
| 18 | DA  | H8  | 17 | DT  | H6   | 4.50 | 5.50 |
| 19 | DG  | H8  | 18 | DA  | H8   | 5.00 | 6.00 |
| 20 | DC  | H3' | 20 | DC  | H2'1 | 2.14 | 2.96 |
| 20 | DC  | H6  | 19 | DG  | H8   | 4.50 | 5.50 |
| 20 | DC  | H6  | 20 | DC  | H3'  | 2.72 | 4.46 |
| 20 | DC  | H5  | 20 | DC  | H2'1 | 3.23 | 4.29 |
| 20 | DC  | H5  | 20 | DC  | H3'  | 4.31 | 5.63 |
| 22 | DA  | H8  | 21 | DT  | H3'  | 5.00 | 6.00 |
| 24 | DC3 | H6  | 24 | DC3 | H1'  | 2.98 | 4.02 |
| 25 | HNE | H3  | 25 | HNE | H21  | 2.45 | 3.31 |
| 25 | HNE | H3  | 25 | HNE | H22  | 2.38 | 3.28 |
| 25 | HNE | H4  | 25 | HNE | H22  | 2.54 | 3.36 |
| 25 | HNE | H4  | 25 | HNE | H3   | 2.35 | 3.07 |
| 25 | HNE | H52 | 18 | DA  | H8   | 5.00 | 6.00 |
| 25 | HNE | Q6  | 25 | HNE | H3   | 2.54 | 4.08 |
| 25 | HNE | Q6  | 25 | HNE | H4   | 2.69 | 3.85 |

|   |     |      |   |     |      |      |      |
|---|-----|------|---|-----|------|------|------|
| 1 | DG5 | H1'  | 1 | DG5 | H8   | 3.28 | 4.44 |
| 1 | DG5 | H1'  | 2 | DC  | H5   | 3.08 | 4.18 |
| 1 | DG5 | H3'  | 1 | DG5 | H8   | 2.81 | 3.69 |
| 1 | DG5 | H2'1 | 2 | DC  | H6   | 2.93 | 4.19 |
| 1 | DG5 | H2'2 | 2 | DC  | H6   | 2.21 | 2.95 |
| 2 | DC  | H2'1 | 2 | DC  | H6   | 1.99 | 2.69 |
| 2 | DC  | H2'1 | 2 | DC  | H5   | 3.31 | 4.27 |
| 2 | DC  | H2'2 | 2 | DC  | H6   | 2.77 | 3.57 |
| 2 | DC  | H2'2 | 3 | DT  | M7   | 2.64 | 4.01 |
| 2 | DC  | H1'  | 2 | DC  | H5   | 4.27 | 5.77 |
| 2 | DC  | H1'  | 3 | DT  | H1'  | 3.45 | 4.67 |
| 2 | DC  | H1'  | 3 | DT  | M7   | 3.92 | 5.30 |
| 3 | DT  | H3'  | 4 | DA  | H8   | 3.70 | 6.52 |
| 3 | DT  | H6   | 4 | DA  | H8   | 3.87 | 6.68 |
| 5 | DG  | H1'  | 5 | DG  | H8   | 2.82 | 3.82 |
| 5 | DG  | H1'  | 6 | DC  | H6   | 2.87 | 4.13 |
| 5 | DG  | H1'  | 6 | DC  | H5   | 3.02 | 4.08 |
| 6 | DC  | H1'  | 6 | DC  | H2'2 | 2.33 | 3.13 |
| 6 | DC  | H2'1 | 6 | DC  | H3'  | 2.35 | 2.89 |
| 6 | DC  | H2'1 | 6 | DC  | H5   | 3.19 | 4.31 |
| 6 | DC  | H2'1 | 7 | DGH | H8   | 3.65 | 5.49 |
| 7 | DGH | H1'  | 7 | DGH | H2'2 | 2.19 | 2.97 |
| 7 | DGH | H1'  | 7 | DGH | H8   | 3.77 | 4.61 |
| 8 | DA  | H1'  | 8 | DA  | H8   | 3.00 | 4.00 |
| 9 | DG  | H1'  | 9 | DG  | H2'1 | 2.35 | 3.03 |
| 8 | DA  | H3'  | 9 | DG  | H8   | 3.49 | 5.19 |



|    |     |      |    |     |      |      |      |
|----|-----|------|----|-----|------|------|------|
| 9  | DG  | H2'2 | 10 | DT  | H6   | 2.02 | 2.63 |
| 10 | DT  | H1'  | 10 | DT  | H6   | 2.93 | 3.97 |
| 10 | DT  | H1'  | 10 | DT  | M7   | 3.86 | 5.22 |
| 10 | DT  | H2'1 | 10 | DT  | H6   | 1.95 | 2.63 |
| 10 | DT  | H2'1 | 10 | DT  | M7   | 2.91 | 3.75 |
| 12 | DC3 | H1'  | 12 | DC3 | H3'  | 2.83 | 3.83 |
| 12 | DC3 | H1'  | 12 | DC3 | H6   | 2.82 | 3.70 |
| 12 | DC3 | H1'  | 12 | DC3 | H5   | 4.80 | 6.50 |
| 14 | DG  | H3'  | 14 | DG  | H8   | 3.24 | 4.28 |
| 15 | DA  | H1'  | 15 | DA  | H2'1 | 2.39 | 3.23 |
| 15 | DA  | H1'  | 15 | DA  | H2'2 | 2.01 | 2.71 |
| 15 | DA  | H1'  | 15 | DA  | H3'  | 2.78 | 3.76 |
| 15 | DA  | H1'  | 15 | DA  | H8   | 3.00 | 3.98 |
| 15 | DA  | H1'  | 15 | DA  | H2   | 4.05 | 5.47 |
| 15 | DA  | H1'  | 16 | DC  | H1'  | 3.83 | 5.17 |
| 15 | DA  | H1'  | 16 | DC  | H3'  | 4.35 | 5.49 |
| 15 | DA  | H1'  | 16 | DC  | H6   | 2.53 | 3.43 |
| 15 | DA  | H1'  | 16 | DC  | H5   | 3.49 | 4.73 |
| 14 | DG  | H1'  | 15 | DA  | H8   | 2.48 | 3.22 |
| 11 | DC  | H1'  | 15 | DA  | H2   | 3.10 | 4.20 |
| 16 | DC  | H2'2 | 16 | DC  | H6   | 3.05 | 4.13 |
| 16 | DC  | H2'2 | 16 | DC  | H5   | 3.12 | 5.49 |
| 16 | DC  | H2'2 | 17 | DT  | H6   | 2.35 | 3.19 |
| 17 | DT  | H2'1 | 17 | DT  | H3'  | 2.06 | 2.78 |
| 17 | DT  | H2'1 | 17 | DT  | H6   | 1.89 | 2.67 |
| 17 | DT  | H2'1 | 18 | DA  | H8   | 3.68 | 4.98 |

|    |     |      |    |     |      |      |      |
|----|-----|------|----|-----|------|------|------|
| 17 | DT  | H1'  | 17 | DT  | H6   | 2.84 | 3.74 |
| 17 | DT  | H1'  | 25 | HNE | H21  | 4.00 | 5.00 |
| 8  | DA  | H2   | 25 | HNE | H21  | 3.00 | 4.00 |
| 8  | DA  | H2   | 25 | HNE | H52  | 3.39 | 4.49 |
| 17 | DT  | H2'2 | 18 | DA  | H8   | 2.67 | 3.43 |
| 20 | DC  | H1'  | 20 | DC  | H2'1 | 2.29 | 3.03 |
| 20 | DC  | H1'  | 21 | DT  | H3'  | 4.31 | 5.47 |
| 21 | DT  | H6   | 22 | DA  | H8   | 2.77 | 6.40 |
| 23 | DG  | H1'  | 23 | DG  | H2'2 | 2.16 | 2.92 |
| 23 | DG  | H1'  | 23 | DG  | H8   | 2.83 | 3.83 |
| 23 | DG  | H1'  | 24 | DC3 | H1'  | 4.05 | 5.47 |
| 23 | DG  | H1'  | 24 | DC3 | H5   | 4.49 | 6.07 |
| 23 | DG  | H3'  | 24 | DC3 | H6   | 3.60 | 4.88 |
| 24 | DC3 | H3'  | 24 | DC3 | H6   | 2.73 | 3.69 |
| 24 | DC3 | H3'  | 24 | DC3 | H5   | 4.35 | 5.36 |
| 18 | DA  | H1'  | 25 | HNE | H21  | 4.21 | 5.69 |
| 18 | DA  | H1'  | 25 | HNE | H22  | 3.12 | 4.22 |
| 18 | DA  | H1'  | 25 | HNE | H51  | 3.28 | 4.64 |
| 18 | DA  | H2   | 25 | HNE | H21  | 3.50 | 4.50 |
| 18 | DA  | H2   | 25 | HNE | H3   | 1.91 | 2.75 |
| 18 | DA  | H2   | 25 | HNE | H4   | 4.00 | 5.00 |
| 18 | DA  | H2   | 25 | HNE | Q6   | 5.00 | 6.00 |
| 25 | HNE | H1   | 25 | HNE | H21  | 1.50 | 2.50 |
| 25 | HNE | H1   | 25 | HNE | H22  | 2.19 | 2.89 |
| 25 | HNE | H1   | 25 | HNE | H4   | 2.86 | 4.04 |
| 25 | HNE | H1   | 25 | HNE | H52  | 3.50 | 4.50 |

|    |     |      |    |     |      |      |      |
|----|-----|------|----|-----|------|------|------|
| 25 | HNE | H1   | 25 | HNE | Q6   | 5.14 | 6.96 |
| 18 | DA  | H4'  | 25 | HNE | H22  | 2.85 | 3.79 |
| 18 | DA  | H4'  | 25 | HNE | H4   | 4.50 | 5.50 |
| 18 | DA  | H4'  | 25 | HNE | M9   | 3.74 | 5.06 |
| 19 | DG  | H4'  | 25 | HNE | H51  | 2.56 | 3.64 |
| 19 | DG  | H4'  | 25 | HNE | Q6   | 3.05 | 4.23 |
| 19 | DG  | H4'  | 25 | HNE | M9   | 4.48 | 6.06 |
| 18 | DA  | H5'2 | 25 | HNE | Q8   | 2.66 | 3.26 |
| 9  | DG  | H5'1 | 25 | HNE | M9   | 3.50 | 4.50 |
| 19 | DG  | H1'  | 25 | HNE | M9   | 4.79 | 6.33 |
| 1  | DG5 | H8   | 1  | DG5 | H2'1 | 1.93 | 2.61 |
| 1  | DG5 | H8   | 1  | DG5 | H2'2 | 2.77 | 3.67 |
| 11 | DC  | H6   | 10 | DT  | H6   | 3.47 | 4.69 |
| 17 | DT  | H3'  | 17 | DT  | H2'2 | 2.20 | 2.98 |
| 17 | DT  | H6   | 17 | DT  | H2'2 | 2.88 | 3.72 |
| 19 | DG  | H8   | 19 | DG  | H1'  | 3.00 | 3.92 |
| 23 | DG  | H8   | 22 | DA  | H8   | 3.52 | 4.76 |
| 24 | DC3 | H6   | 23 | DG  | H8   | 3.92 | 4.96 |
| 24 | DC3 | H5   | 23 | DG  | H8   | 3.85 | 4.83 |
| 25 | HNE | H4   | 25 | HNE | H21  | 2.11 | 2.99 |
| 25 | HNE | H51  | 25 | HNE | H1   | 4.50 | 5.50 |
| 25 | HNE | H51  | 25 | HNE | H4   | 2.30 | 3.12 |
| 25 | HNE | H52  | 25 | HNE | H4   | 2.09 | 2.69 |
| 25 | HNE | M9   | 25 | HNE | Q6   | 3.22 | 4.68 |
| 1  | DG5 | H1'  | 1  | DG5 | H2'1 | 2.31 | 3.35 |
| 1  | DG5 | H1'  | 1  | DG5 | H2'2 | 1.73 | 2.35 |

|    |     |      |    |     |      |      |      |
|----|-----|------|----|-----|------|------|------|
| 2  | DC  | H5   | 3  | DT  | M7   | 2.55 | 3.45 |
| 3  | DT  | H1'  | 4  | DA  | H8   | 3.46 | 4.60 |
| 3  | DT  | H2'1 | 4  | DA  | H8   | 3.50 | 4.50 |
| 4  | DA  | H1'  | 4  | DA  | H8   | 2.94 | 3.80 |
| 6  | DC  | H1'  | 6  | DC  | H2'1 | 2.62 | 3.16 |
| 6  | DC  | H3'  | 6  | DC  | H6   | 3.01 | 4.07 |
| 5  | DG  | H8   | 6  | DC  | H5   | 3.12 | 4.22 |
| 7  | DGH | H2'1 | 7  | DGH | H8   | 2.37 | 3.57 |
| 7  | DGH | H1'  | 8  | DA  | H8   | 4.00 | 5.00 |
| 9  | DG  | H1'  | 10 | DT  | H6   | 2.98 | 3.68 |
| 9  | DG  | H8   | 10 | DT  | M7   | 2.55 | 3.45 |
| 11 | DC  | H1'  | 12 | DC3 | H6   | 2.64 | 3.56 |
| 13 | DG5 | H1'  | 13 | DG5 | H2'2 | 1.78 | 2.40 |
| 13 | DG5 | H1'  | 13 | DG5 | H3'  | 3.75 | 4.75 |
| 14 | DG  | H1'  | 14 | DG  | H2'1 | 2.36 | 3.12 |
| 14 | DG  | H1'  | 14 | DG  | H2'2 | 2.27 | 3.07 |
| 17 | DT  | H1'  | 17 | DT  | H2'2 | 2.04 | 2.76 |
| 16 | DC  | H1'  | 17 | DT  | M7   | 3.48 | 4.58 |
| 18 | DA  | H2   | 19 | DG  | H1'  | 3.50 | 4.52 |
| 18 | DA  | H2   | 25 | HNE | H1   | 4.00 | 5.00 |
| 18 | DA  | H2   | 25 | HNE | H22  | 2.52 | 3.22 |
| 18 | DA  | H2   | 25 | HNE | H51  | 3.61 | 4.89 |
| 18 | DA  | H2   | 25 | HNE | H52  | 4.00 | 5.00 |
| 20 | DC  | H1'  | 20 | DC  | H6   | 3.00 | 4.00 |
| 20 | DC  | H1'  | 21 | DT  | M7   | 3.42 | 4.62 |
| 20 | DC  | H2'1 | 21 | DT  | H6   | 2.02 | 2.72 |

|    |     |      |    |     |      |      |      |
|----|-----|------|----|-----|------|------|------|
| 20 | DC  | H3'  | 21 | DT  | H6   | 3.58 | 4.84 |
| 21 | DT  | H1'  | 21 | DT  | H6   | 3.00 | 4.00 |
| 21 | DT  | H1'  | 22 | DA  | H8   | 3.26 | 4.42 |
| 20 | DC  | H5   | 21 | DT  | M7   | 2.41 | 3.27 |
| 21 | DT  | H2'1 | 22 | DA  | H8   | 3.00 | 4.00 |
| 21 | DT  | H2'2 | 22 | DA  | H8   | 2.50 | 3.50 |
| 22 | DA  | H1'  | 22 | DA  | H8   | 3.50 | 4.50 |
| 24 | DC3 | H1'  | 24 | DC3 | H3'  | 3.06 | 4.00 |
| 23 | DG  | H2'2 | 24 | DC3 | H6   | 2.10 | 2.80 |
| 23 | DG  | H2'1 | 24 | DC3 | H5   | 3.09 | 4.29 |
| 24 | DC3 | H2'1 | 24 | DC3 | H5   | 3.23 | 4.19 |
| 18 | DA  | H1'  | 25 | HNE | H1   | 5.00 | 6.00 |
| 18 | DA  | H4'  | 25 | HNE | H21  | 3.31 | 4.41 |
| 18 | DA  | H4'  | 25 | HNE | Q6   | 2.75 | 3.83 |
| 8  | DA  | H2   | 25 | HNE | H22  | 5.00 | 6.00 |
| 25 | HNE | H3   | 25 | HNE | H51  | 1.95 | 2.63 |
| 18 | DA  | H5'2 | 25 | HNE | Q7   | 3.13 | 4.23 |
| 25 | HNE | Q8   | 25 | HNE | M9   | 2.18 | 2.96 |
| 10 | DT  | H6   | 9  | DG  | H8   | 3.51 | 4.75 |
| 12 | DC3 | H5   | 11 | DC  | H6   | 3.10 | 4.20 |
| 17 | DT  | H6   | 17 | DT  | H3'  | 2.47 | 3.35 |
| 20 | DC  | H6   | 20 | DC  | H2'2 | 3.06 | 3.71 |
| 21 | DT  | M7   | 20 | DC  | H6   | 2.25 | 3.05 |
| 25 | HNE | M9   | 25 | HNE | Q7   | 2.50 | 3.50 |
| 1  | DG5 | H1'  | 2  | DC  | H6   | 2.30 | 3.12 |
| 2  | DC  | H1'  | 2  | DC  | H6   | 2.94 | 3.67 |

|    |     |      |    |     |      |      |      |
|----|-----|------|----|-----|------|------|------|
| 2  | DC  | H3'  | 2  | DC  | H6   | 3.00 | 3.77 |
| 1  | DG5 | H2'1 | 2  | DC  | H5   | 2.38 | 3.22 |
| 2  | DC  | H2'2 | 3  | DT  | H6   | 2.38 | 3.65 |
| 3  | DT  | H3'  | 3  | DT  | H6   | 2.92 | 3.96 |
| 4  | DA  | H8   | 5  | DG  | H8   | 3.11 | 4.21 |
| 6  | DC  | H2'2 | 6  | DC  | H3'  | 2.25 | 3.05 |
| 5  | DG  | H2'2 | 6  | DC  | H6   | 2.36 | 3.05 |
| 5  | DG  | H2'2 | 6  | DC  | H5   | 2.64 | 3.58 |
| 7  | DGH | H1'  | 7  | DGH | H2'1 | 2.73 | 3.43 |
| 7  | DGH | H2'2 | 7  | DGH | H8   | 3.50 | 4.50 |
| 7  | DGH | H2'2 | 8  | DA  | H8   | 2.50 | 3.50 |
| 8  | DA  | H1'  | 9  | DG  | H8   | 2.46 | 3.32 |
| 10 | DT  | H3'  | 10 | DT  | H6   | 2.97 | 4.01 |
| 11 | DC  | H3'  | 11 | DC  | H6   | 3.50 | 4.50 |
| 11 | DC  | H2'1 | 12 | DC3 | H5   | 3.02 | 4.52 |
| 11 | DC  | H2'2 | 12 | DC3 | H5   | 2.76 | 3.74 |
| 13 | DG5 | H3'  | 13 | DG5 | H8   | 3.65 | 4.97 |
| 14 | DG  | H1'  | 14 | DG  | H3'  | 2.81 | 3.81 |
| 16 | DC  | H1'  | 16 | DC  | H2'2 | 1.96 | 2.64 |
| 16 | DC  | H1'  | 16 | DC  | H3'  | 2.87 | 3.89 |
| 17 | DT  | H1'  | 17 | DT  | H2'1 | 2.30 | 3.00 |
| 17 | DT  | H1'  | 17 | DT  | H3'  | 2.90 | 3.82 |
| 18 | DA  | H1'  | 18 | DA  | H8   | 2.93 | 3.79 |
| 18 | DA  | H1'  | 18 | DA  | H2   | 3.20 | 4.34 |
| 18 | DA  | H1'  | 19 | DG  | H8   | 2.55 | 3.45 |
| 18 | DA  | H2'1 | 18 | DA  | H8   | 2.06 | 2.78 |

|    |     |      |    |     |      |      |      |
|----|-----|------|----|-----|------|------|------|
| 18 | DA  | H2'2 | 18 | DA  | H8   | 3.00 | 4.00 |
| 18 | DA  | H3'  | 18 | DA  | H8   | 3.50 | 4.50 |
| 19 | DG  | H3'  | 19 | DG  | H8   | 3.50 | 4.50 |
| 20 | DC  | H1'  | 20 | DC  | H2'2 | 1.83 | 2.47 |
| 20 | DC  | H1'  | 20 | DC  | H3'  | 2.93 | 3.97 |
| 19 | DG  | H2'2 | 20 | DC  | H6   | 2.19 | 2.97 |
| 19 | DG  | H2'2 | 20 | DC  | H5   | 2.67 | 3.39 |
| 19 | DG  | H1'  | 20 | DC  | H5   | 3.79 | 5.13 |
| 21 | DT  | H3'  | 21 | DT  | H6   | 3.03 | 5.10 |
| 20 | DC  | H2'1 | 21 | DT  | M7   | 2.75 | 3.79 |
| 23 | DG  | H1'  | 23 | DG  | H2'1 | 2.42 | 3.16 |
| 23 | DG  | H2'2 | 23 | DG  | H8   | 2.75 | 3.57 |
| 24 | DC3 | H2'1 | 24 | DC3 | H3'  | 2.00 | 2.70 |
| 24 | DC3 | H2'2 | 24 | DC3 | H3'  | 2.23 | 3.01 |
| 24 | DC3 | H2'2 | 24 | DC3 | H5   | 4.43 | 5.99 |
| 18 | DA  | H4'  | 25 | HNE | H51  | 2.61 | 3.35 |
| 18 | DA  | H5'1 | 25 | HNE | Q6   | 2.80 | 3.80 |
| 19 | DG  | H5'1 | 25 | HNE | Q7   | 3.19 | 4.31 |
| 19 | DG  | H5'1 | 25 | HNE | M9   | 4.55 | 5.66 |
| 6  | DC  | H6   | 5  | DG  | H8   | 3.84 | 5.20 |
| 7  | DGH | H8   | 6  | DC  | H6   | 5.00 | 6.00 |
| 20 | DC  | H5   | 19 | DG  | H8   | 3.07 | 4.15 |
| 25 | HNE | H3   | 25 | HNE | H1   | 3.00 | 4.00 |
| 25 | HNE | H52  | 25 | HNE | H3   | 2.19 | 2.81 |
| 1  | DG5 | H1'  | 1  | DG5 | H3'  | 3.15 | 4.11 |
| 1  | DG5 | H2'2 | 2  | DC  | H5   | 2.62 | 3.54 |

|    |     |      |    |     |      |      |      |
|----|-----|------|----|-----|------|------|------|
| 3  | DT  | H2'2 | 4  | DA  | H8   | 2.56 | 3.46 |
| 6  | DC  | H1'  | 6  | DC  | H3'  | 2.89 | 3.83 |
| 5  | DG  | H2'1 | 6  | DC  | H6   | 3.08 | 4.16 |
| 6  | DC  | H2'1 | 6  | DC  | H6   | 1.85 | 2.57 |
| 7  | DGH | H2'1 | 8  | DA  | H8   | 3.00 | 4.00 |
| 8  | DA  | H1'  | 9  | DG  | H2'1 | 3.50 | 4.50 |
| 9  | DG  | H1'  | 9  | DG  | H3'  | 3.30 | 3.99 |
| 9  | DG  | H1'  | 10 | DT  | M7   | 2.94 | 3.98 |
| 9  | DG  | H2'2 | 10 | DT  | M7   | 2.84 | 3.84 |
| 10 | DT  | H2'1 | 11 | DC  | H5   | 2.99 | 3.69 |
| 10 | DT  | H2'2 | 11 | DC  | H5   | 2.25 | 3.05 |
| 14 | DG  | H1'  | 14 | DG  | H8   | 2.86 | 3.86 |
| 16 | DC  | H2'2 | 16 | DC  | H3'  | 2.08 | 2.82 |
| 18 | DA  | H1'  | 18 | DA  | H2'1 | 2.48 | 3.22 |
| 20 | DC  | H2'2 | 20 | DC  | H3'  | 2.24 | 2.96 |
| 19 | DG  | H2'1 | 20 | DC  | H6   | 2.91 | 3.93 |
| 19 | DG  | H2'1 | 20 | DC  | H5   | 2.76 | 3.74 |
| 20 | DC  | H2'1 | 20 | DC  | H6   | 2.19 | 2.97 |
| 20 | DC  | H1'  | 21 | DT  | H6   | 3.63 | 4.91 |
| 21 | DT  | H2'1 | 21 | DT  | H6   | 1.96 | 2.64 |
| 24 | DC3 | H1'  | 24 | DC3 | H2'1 | 2.45 | 3.01 |
| 24 | DC3 | H1'  | 24 | DC3 | H2'2 | 1.91 | 2.59 |
| 23 | DG  | H1'  | 24 | DC3 | H6   | 3.08 | 4.16 |
| 23 | DG  | H2'1 | 24 | DC3 | H6   | 2.96 | 4.00 |
| 23 | DG  | H2'2 | 24 | DC3 | H5   | 3.14 | 4.26 |
| 8  | DA  | H2   | 25 | HNE | H1   | 3.00 | 4.00 |



|    |     |     |    |     |      |      |      |
|----|-----|-----|----|-----|------|------|------|
| 25 | HNE | H22 | 25 | HNE | H51  | 2.45 | 3.03 |
| 25 | HNE | H22 | 25 | HNE | H52  | 1.95 | 2.63 |
| 18 | DA  | H4' | 25 | HNE | Q7   | 2.85 | 3.85 |
| 19 | DG  | H4' | 25 | HNE | Q7   | 4.34 | 5.88 |
| 25 | HNE | H4  | 25 | HNE | Q7   | 2.50 | 3.50 |
| 2  | DC  | H3' | 2  | DC  | H2'1 | 2.25 | 2.89 |
| 2  | DC  | H3' | 2  | DC  | H2'2 | 2.26 | 3.06 |
| 3  | DT  | H6  | 2  | DC  | H2'1 | 2.52 | 3.21 |
| 3  | DT  | H6  | 2  | DC  | H3'  | 3.77 | 4.99 |
| 3  | DT  | H6  | 3  | DT  | H2'1 | 1.81 | 2.45 |
| 3  | DT  | M7  | 2  | DC  | H2'1 | 2.77 | 3.75 |
| 3  | DT  | M7  | 2  | DC  | H3'  | 3.54 | 4.78 |
| 3  | DT  | M7  | 3  | DT  | H2'1 | 3.06 | 4.14 |
| 3  | DT  | M7  | 3  | DT  | H3'  | 3.68 | 4.98 |
| 4  | DA  | H3' | 4  | DA  | H2'1 | 1.91 | 2.59 |
| 4  | DA  | H3' | 4  | DA  | H2'2 | 2.56 | 3.46 |
| 4  | DA  | H8  | 4  | DA  | H2'1 | 2.04 | 2.76 |
| 4  | DA  | H8  | 4  | DA  | H2'2 | 2.75 | 3.57 |
| 4  | DA  | H8  | 4  | DA  | H3'  | 2.97 | 3.91 |
| 5  | DG  | H3' | 5  | DG  | H2'1 | 2.34 | 3.38 |
| 5  | DG  | H3' | 5  | DG  | H2'2 | 2.48 | 3.36 |
| 5  | DG  | H8  | 4  | DA  | H2'1 | 3.22 | 4.04 |
| 5  | DG  | H8  | 4  | DA  | H2'2 | 2.42 | 3.34 |
| 5  | DG  | H8  | 4  | DA  | H3'  | 3.99 | 4.93 |
| 5  | DG  | H8  | 5  | DG  | H2'1 | 2.00 | 2.70 |
| 5  | DG  | H8  | 5  | DG  | H3'  | 3.86 | 5.22 |

|    |     |     |    |     |      |      |      |
|----|-----|-----|----|-----|------|------|------|
| 6  | DC  | H6  | 5  | DG  | H3'  | 4.16 | 5.62 |
| 6  | DC  | H5  | 5  | DG  | H2'1 | 2.70 | 3.64 |
| 8  | DA  | H3' | 8  | DA  | H2'1 | 2.20 | 2.98 |
| 8  | DA  | H3' | 8  | DA  | H2'2 | 2.47 | 3.35 |
| 8  | DA  | H8  | 7  | DGH | H8   | 4.50 | 5.50 |
| 8  | DA  | H8  | 8  | DA  | H2'2 | 2.98 | 3.54 |
| 8  | DA  | H8  | 8  | DA  | H3'  | 3.50 | 4.50 |
| 9  | DG  | H8  | 8  | DA  | H2'1 | 2.99 | 4.05 |
| 9  | DG  | H8  | 8  | DA  | H2'2 | 2.60 | 3.66 |
| 9  | DG  | H8  | 9  | DG  | H2'2 | 2.62 | 3.54 |
| 10 | DT  | M7  | 10 | DT  | H3'  | 4.50 | 5.50 |
| 11 | DC  | H3' | 11 | DC  | H2'2 | 2.50 | 3.38 |
| 11 | DC  | H6  | 10 | DT  | H2'1 | 2.71 | 3.63 |
| 11 | DC  | H6  | 10 | DT  | H3'  | 3.58 | 4.84 |
| 11 | DC  | H6  | 10 | DT  | M7   | 3.84 | 4.98 |
| 11 | DC  | H6  | 11 | DC  | H2'1 | 2.13 | 3.03 |
| 11 | DC  | H6  | 11 | DC  | H2'2 | 3.08 | 4.16 |
| 12 | DC3 | H3' | 12 | DC3 | H2'1 | 2.33 | 3.23 |
| 12 | DC3 | H3' | 12 | DC3 | H2'2 | 2.58 | 3.28 |
| 12 | DC3 | H6  | 11 | DC  | H2'1 | 2.88 | 3.80 |
| 12 | DC3 | H6  | 11 | DC  | H2'2 | 2.41 | 3.41 |
| 12 | DC3 | H6  | 11 | DC  | H5   | 5.00 | 6.00 |
| 12 | DC3 | H6  | 12 | DC3 | H2'1 | 3.02 | 3.90 |
| 13 | DG5 | H3' | 13 | DG5 | H2'1 | 2.21 | 2.99 |
| 13 | DG5 | H8  | 13 | DG5 | H2'1 | 2.17 | 3.07 |
| 14 | DG  | H8  | 13 | DG5 | H2'1 | 2.83 | 3.83 |

|    |     |      |    |     |      |      |      |
|----|-----|------|----|-----|------|------|------|
| 17 | DT  | M7   | 17 | DT  | H3'  | 3.41 | 4.61 |
| 18 | DA  | H3'  | 18 | DA  | H2'2 | 2.25 | 2.95 |
| 19 | DG  | H3'  | 19 | DG  | H2'1 | 2.14 | 3.00 |
| 19 | DG  | H3'  | 19 | DG  | H2'2 | 2.66 | 3.35 |
| 19 | DG  | H8   | 18 | DA  | H2'2 | 2.94 | 4.09 |
| 19 | DG  | H8   | 19 | DG  | H2'1 | 2.05 | 2.77 |
| 20 | DC  | H6   | 19 | DG  | H3'  | 4.28 | 5.80 |
| 21 | DT  | H3'  | 21 | DT  | H2'1 | 1.72 | 2.32 |
| 21 | DT  | H3'  | 21 | DT  | H2'2 | 2.85 | 3.85 |
| 21 | DT  | M7   | 20 | DC  | H3'  | 2.94 | 3.98 |
| 21 | DT  | M7   | 21 | DT  | H2'1 | 2.97 | 4.01 |
| 21 | DT  | M7   | 21 | DT  | H3'  | 3.80 | 5.04 |
| 22 | DA  | H2'1 | 22 | DA  | H1'  | 2.70 | 3.64 |
| 22 | DA  | H2'2 | 22 | DA  | H1'  | 2.09 | 2.83 |
| 22 | DA  | H3'  | 22 | DA  | H1'  | 3.08 | 4.16 |
| 22 | DA  | H3'  | 22 | DA  | H2'1 | 1.96 | 2.66 |
| 22 | DA  | H3'  | 22 | DA  | H2'2 | 2.37 | 3.21 |
| 22 | DA  | H8   | 22 | DA  | H2'1 | 2.14 | 2.71 |
| 22 | DA  | H8   | 22 | DA  | H2'2 | 2.81 | 3.67 |
| 22 | DA  | H8   | 22 | DA  | H3'  | 3.50 | 4.50 |
| 23 | DG  | H8   | 22 | DA  | H1'  | 2.83 | 3.83 |
| 23 | DG  | H8   | 22 | DA  | H2'1 | 3.38 | 4.42 |
| 23 | DG  | H8   | 22 | DA  | H2'2 | 2.67 | 3.61 |
| 23 | DG  | H8   | 22 | DA  | H3'  | 3.97 | 5.37 |
| 23 | DG  | H8   | 23 | DG  | H3'  | 3.15 | 4.92 |
| 24 | DC3 | H6   | 24 | DC3 | H2'1 | 1.95 | 2.63 |

|    |     |     |    |     |      |      |      |
|----|-----|-----|----|-----|------|------|------|
| 25 | HNE | Q6  | 25 | HNE | H51  | 1.85 | 2.51 |
| 25 | HNE | Q6  | 25 | HNE | H52  | 2.32 | 3.14 |
| 25 | HNE | Q7  | 25 | HNE | Q6   | 2.57 | 3.47 |
| 25 | HNE | Q8  | 25 | HNE | Q6   | 2.10 | 2.84 |
| 1  | DG5 | H1' | 2  | DC  | H2'1 | 3.11 | 4.21 |
| 1  | DG5 | H1' | 2  | DC  | H2'2 | 3.98 | 5.24 |
| 2  | DC  | H1' | 2  | DC  | H2'1 | 2.53 | 3.43 |
| 2  | DC  | H1' | 2  | DC  | H2'2 | 2.22 | 2.72 |
| 2  | DC  | H1' | 3  | DT  | H6   | 3.08 | 4.16 |
| 1  | DG5 | H3' | 2  | DC  | H6   | 3.79 | 5.07 |
| 3  | DT  | H1' | 3  | DT  | H2'1 | 2.25 | 3.05 |
| 3  | DT  | H1' | 3  | DT  | H2'2 | 1.77 | 2.39 |
| 3  | DT  | H1' | 3  | DT  | H3'  | 2.98 | 3.96 |
| 3  | DT  | H1' | 3  | DT  | H6   | 3.05 | 4.13 |
| 3  | DT  | H1' | 3  | DT  | M7   | 4.50 | 5.50 |
| 4  | DA  | H1' | 4  | DA  | H2'1 | 2.68 | 3.62 |
| 4  | DA  | H1' | 4  | DA  | H2'2 | 1.96 | 2.64 |
| 4  | DA  | H1' | 4  | DA  | H3'  | 2.92 | 3.96 |
| 4  | DA  | H1' | 5  | DG  | H8   | 2.80 | 3.72 |
| 5  | DG  | H1' | 5  | DG  | H2'1 | 2.23 | 3.01 |
| 5  | DG  | H1' | 5  | DG  | H2'2 | 2.36 | 3.13 |
| 5  | DG  | H1' | 5  | DG  | H3'  | 3.37 | 4.55 |
| 6  | DC  | H1' | 6  | DC  | H6   | 2.82 | 3.64 |
| 6  | DC  | H1' | 6  | DC  | H5   | 4.06 | 5.48 |
| 6  | DC  | H1' | 7  | DGH | H8   | 3.25 | 4.41 |
| 6  | DC  | H3' | 6  | DC  | H5   | 4.92 | 6.44 |

|    |     |      |    |     |      |      |      |
|----|-----|------|----|-----|------|------|------|
| 6  | DC  | H3'  | 7  | DGH | H8   | 2.75 | 3.73 |
| 6  | DC  | H2'2 | 7  | DGH | H8   | 1.81 | 2.45 |
| 7  | DGH | H3'  | 7  | DGH | H8   | 3.26 | 4.40 |
| 8  | DA  | H1'  | 8  | DA  | H2'1 | 2.47 | 3.35 |
| 8  | DA  | H1'  | 8  | DA  | H2'2 | 2.26 | 3.16 |
| 8  | DA  | H1'  | 8  | DA  | H3'  | 2.89 | 3.91 |
| 9  | DG  | H1'  | 9  | DG  | H2'2 | 1.72 | 2.32 |
| 9  | DG  | H1'  | 9  | DG  | H8   | 2.81 | 3.81 |
| 9  | DG  | H2'1 | 9  | DG  | H8   | 1.84 | 2.50 |
| 9  | DG  | H2'1 | 10 | DT  | H6   | 3.00 | 4.00 |
| 9  | DG  | H3'  | 9  | DG  | H8   | 3.50 | 4.50 |
| 9  | DG  | H3'  | 10 | DT  | H6   | 3.83 | 5.17 |
| 9  | DG  | H3'  | 10 | DT  | M7   | 2.92 | 3.94 |
| 10 | DT  | H1'  | 10 | DT  | H2'1 | 2.42 | 3.14 |
| 10 | DT  | H1'  | 10 | DT  | H2'2 | 2.21 | 2.99 |
| 10 | DT  | H1'  | 10 | DT  | H3'  | 3.00 | 3.92 |
| 10 | DT  | H1'  | 11 | DC  | H6   | 2.10 | 2.84 |
| 10 | DT  | H1'  | 11 | DC  | H5   | 3.86 | 5.22 |
| 11 | DC  | H1'  | 11 | DC  | H2'1 | 2.41 | 3.27 |
| 11 | DC  | H1'  | 11 | DC  | H2'2 | 2.46 | 3.19 |
| 11 | DC  | H1'  | 12 | DC3 | H5   | 3.33 | 4.51 |
| 12 | DC3 | H1'  | 12 | DC3 | H2'1 | 2.18 | 2.94 |
| 12 | DC3 | H1'  | 12 | DC3 | H2'2 | 2.31 | 3.13 |
| 13 | DG5 | H1'  | 13 | DG5 | H2'1 | 2.32 | 3.00 |
| 13 | DG5 | H1'  | 13 | DG5 | H8   | 3.08 | 4.18 |
| 13 | DG5 | H2'2 | 13 | DG5 | H3'  | 2.36 | 3.20 |

|    |     |      |    |     |      |      |      |
|----|-----|------|----|-----|------|------|------|
| 13 | DG5 | H2'2 | 14 | DG  | H8   | 2.57 | 3.27 |
| 14 | DG  | H2'1 | 14 | DG  | H3'  | 2.22 | 3.10 |
| 14 | DG  | H2'1 | 14 | DG  | H8   | 2.21 | 2.99 |
| 14 | DG  | H2'1 | 15 | DA  | H8   | 2.80 | 3.78 |
| 14 | DG  | H2'2 | 14 | DG  | H3'  | 2.19 | 2.81 |
| 15 | DA  | H2'1 | 15 | DA  | H3'  | 2.19 | 2.79 |
| 15 | DA  | H2'1 | 15 | DA  | H8   | 2.12 | 2.81 |
| 15 | DA  | H2'2 | 15 | DA  | H3'  | 2.31 | 3.13 |
| 15 | DA  | H2'2 | 15 | DA  | H8   | 2.95 | 3.81 |
| 16 | DC  | H2'1 | 17 | DT  | H3'  | 4.00 | 5.20 |
| 16 | DC  | H2'1 | 17 | DT  | M7   | 2.65 | 3.59 |
| 16 | DC  | H2'2 | 17 | DT  | H3'  | 2.90 | 3.92 |
| 16 | DC  | H2'2 | 17 | DT  | M7   | 2.29 | 3.09 |
| 16 | DC  | H3'  | 17 | DT  | H6   | 3.29 | 4.83 |
| 16 | DC  | H3'  | 17 | DT  | M7   | 2.64 | 3.56 |
| 17 | DT  | H1'  | 17 | DT  | M7   | 3.90 | 5.16 |
| 17 | DT  | H1'  | 18 | DA  | H8   | 3.50 | 4.50 |
| 17 | DT  | H1'  | 25 | HNE | H1   | 4.00 | 5.00 |
| 17 | DT  | H2'1 | 17 | DT  | M7   | 3.12 | 4.22 |
| 18 | DA  | H1'  | 18 | DA  | H2'2 | 1.98 | 2.68 |
| 18 | DA  | H1'  | 18 | DA  | H3'  | 2.87 | 3.82 |
| 18 | DA  | H1'  | 25 | HNE | H52  | 3.05 | 4.13 |
| 18 | DA  | H2'1 | 18 | DA  | H3'  | 1.98 | 2.68 |
| 18 | DA  | H2'1 | 19 | DG  | H8   | 3.52 | 4.56 |
| 19 | DG  | H1'  | 19 | DG  | H2'1 | 2.22 | 3.42 |
| 19 | DG  | H1'  | 19 | DG  | H2'2 | 2.05 | 2.77 |

|    |     |      |    |     |      |      |      |
|----|-----|------|----|-----|------|------|------|
| 19 | DG  | H1'  | 19 | DG  | H3'  | 2.94 | 4.12 |
| 19 | DG  | H1'  | 20 | DC  | H3'  | 4.50 | 5.50 |
| 19 | DG  | H1'  | 20 | DC  | H6   | 2.51 | 3.39 |
| 21 | DT  | H1'  | 21 | DT  | H2'1 | 2.65 | 3.59 |
| 21 | DT  | H1'  | 21 | DT  | H2'2 | 1.82 | 2.46 |
| 21 | DT  | H1'  | 21 | DT  | H3'  | 2.82 | 3.82 |
| 21 | DT  | H1'  | 21 | DT  | M7   | 3.85 | 5.21 |
| 20 | DC  | H2'2 | 21 | DT  | H6   | 2.07 | 2.81 |
| 20 | DC  | H2'2 | 21 | DT  | M7   | 2.32 | 3.14 |
| 23 | DG  | H1'  | 23 | DG  | H3'  | 3.79 | 5.13 |
| 23 | DG  | H2'1 | 23 | DG  | H8   | 2.11 | 2.67 |
| 18 | DA  | H5'1 | 25 | HNE | H51  | 4.00 | 5.00 |
| 18 | DA  | H5'1 | 25 | HNE | H52  | 3.13 | 4.23 |
| 18 | DA  | H5'1 | 25 | HNE | Q7   | 3.35 | 4.53 |
| 18 | DA  | H5'1 | 25 | HNE | Q8   | 2.89 | 3.92 |
| 19 | DG  | H5'1 | 25 | HNE | H51  | 2.37 | 3.21 |
| 19 | DG  | H5'1 | 25 | HNE | H52  | 3.31 | 4.40 |
| 19 | DG  | H5'1 | 25 | HNE | Q8   | 3.03 | 4.09 |
| 18 | DA  | H4'  | 25 | HNE | H52  | 2.40 | 3.20 |
| 18 | DA  | H4'  | 25 | HNE | Q8   | 2.48 | 3.36 |
| 19 | DG  | H4'  | 25 | HNE | H52  | 3.23 | 4.15 |
| 19 | DG  | H4'  | 25 | HNE | Q8   | 3.49 | 4.55 |
| 25 | HNE | H21  | 25 | HNE | H52  | 1.70 | 2.70 |
| 25 | HNE | H21  | 25 | HNE | Q6   | 3.25 | 4.19 |
| 25 | HNE | H22  | 25 | HNE | Q6   | 3.30 | 4.46 |
| 25 | HNE | H22  | 25 | HNE | Q7   | 3.46 | 4.50 |

|    |     |    |    |     |    |      |      |
|----|-----|----|----|-----|----|------|------|
| 18 | DA  | H2 | 25 | HNE | Q7 | 4.66 | 6.12 |
| 25 | HNE | H3 | 25 | HNE | Q7 | 3.91 | 5.29 |

M7 represents the methyl group of thymine; DGH represents HNE-dG adduct ( $X^7$ ) without HNE moiety and the atoms are named as regular deoxyguanosine; HNE moiety is considered as a residue with residue No. 25, the atoms are named as following:  $X^7$  H8: HNE H1;  $X^7$  H7 $\alpha$ ( $\beta$ ): HNE H21(2);  $X^7$  H6: HNE H3;  $X^7$  H11: HNE H4;  $X^7$  H12 $\alpha$ ( $\beta$ ): HNE H51(2);  $X^7$  H13: HNE Q6;  $X^7$  H14: HNE Q7;  $X^7$  H15: HNE Q8;  $X^7$  H16: HNE M9



**Table S5.** Backbone torsion angles of the rMD structure at pH 5.5.

| Residue         | Alpha | Beta   | Gamma  | Delta | Epsilon | Zeta   | Chi    |
|-----------------|-------|--------|--------|-------|---------|--------|--------|
| G <sup>1</sup>  |       |        | -175.2 | 150.9 | 178.3   | -98.9  | -100.9 |
| C <sup>2</sup>  | -65.9 | 178.9  | 56.0   | 126.4 | -175.3  | -98.4  | -123.6 |
| T <sup>3</sup>  | -65.3 | -179.3 | 53.6   | 133.8 | -173.4  | -95.0  | -115.8 |
| A <sup>4</sup>  | -69.6 | -176.6 | 47.0   | 128.4 | -177.7  | -104.1 | -115.3 |
| G <sup>5</sup>  | -66.7 | -172.8 | 51.3   | 127.6 | -166.4  | -96.4  | -122.1 |
| C <sup>6</sup>  | -69.5 | 178.4  | 53.3   | 138.3 | -163.8  | -117.3 | -97.0  |
| X <sup>7</sup>  | -78.3 | -174.6 | 49.6   | 153.0 | -88.5   | 178.0  | 114.3  |
| A <sup>8</sup>  | -82.7 | 146.8  | 47.6   | 146.4 | 174.2   | -100.6 | -75.7  |
| G <sup>9</sup>  | -67.2 | -179.2 | 55.5   | 125.2 | -170.6  | -93.0  | -122.0 |
| T <sup>10</sup> | -66.9 | 179.5  | 50.1   | 127.7 | 175.3   | -102.5 | -112.0 |
| C <sup>11</sup> | -60.0 | -172.5 | 52.7   | 139.2 | -166.8  | -85.1  | -113.6 |
| C <sup>12</sup> | -67.5 | 170.8  | 44.9   | 133.7 |         |        | -104.5 |
| G <sup>13</sup> |       |        | 179.9  | 149.5 | -167.9  | -110.5 | -123.6 |
| G <sup>14</sup> | -69.7 | -172.0 | 54.4   | 144.8 | 178.4   | -100.6 | -100.8 |
| A <sup>15</sup> | -65.8 | -173.0 | 50.8   | 138.4 | -179.5  | -94.4  | -105.3 |
| C <sup>16</sup> | -64.5 | 175.2  | 56.1   | 123.7 | -177.0  | -94.6  | -123.5 |
| T <sup>17</sup> | -62.8 | -179.2 | 53.8   | 116.9 | -164.1  | -93.5  | -135.3 |
| A <sup>18</sup> | -65.6 | -174.9 | 52.8   | 137.7 | 179.2   | -98.4  | -96.0  |
| G <sup>19</sup> | -64.1 | 176.4  | 54.7   | 126.1 | -172.9  | -107.8 | -113.9 |
| C <sup>20</sup> | -68.2 | -179.7 | 54.1   | 135.1 | 177.6   | -100.9 | -110.3 |
| T <sup>21</sup> | -64.6 | -179.9 | 55.5   | 130.2 | -173.8  | -95.9  | -125.7 |
| A <sup>22</sup> | -66.1 | -172.6 | 48.0   | 134.5 | -176.4  | -102.8 | -117.5 |
| G <sup>23</sup> | -68.2 | -163.4 | 44.8   | 137.1 | -175.2  | -97.5  | -102.3 |
| C <sup>24</sup> | -67.1 | 169.7  | 59.7   | 117.6 |         |        | -126.5 |

alpha: O3'(i-1)-P-O5'-C5'; beta: P-O5'-C5'-C4'; gamma: O5'-C5'-C4'-C3'; delta: C5'-C4'-C3'-O3'; epsilon: C4'-C3'-O3'-P(i+1); zeta: C3'-O3'-P(i+1)-O5'(i+1); chi for pyrimidines: O4'-C1'-N1-C2; chi for purines: O4'-C1'-N9-C4

**Table S6.** Backbone torsion angles of the rMD structure at pH 8.9.

| Residue         | Alpha  | Beta   | Gamma  | Delta | Epsilon | Zeta   | Chi    |
|-----------------|--------|--------|--------|-------|---------|--------|--------|
| G <sup>1</sup>  |        |        | -172.6 | 150.9 | 172.2   | -92.7  | -94.0  |
| C <sup>2</sup>  | -63.7  | 174.6  | 55.2   | 120.2 | -175.0  | -89.8  | -118.7 |
| T <sup>3</sup>  | -65.0  | 165.3  | 57.9   | 100.5 | -177.7  | -93.8  | -135.4 |
| A <sup>4</sup>  | -61.0  | -175.2 | 53.9   | 138.8 | -171.2  | -92.6  | -102.9 |
| G <sup>5</sup>  | -73.2  | 175.4  | 47.8   | 133.3 | -170.6  | -121.2 | -100.4 |
| C <sup>6</sup>  | -68.8  | 166.8  | 59.6   | 138.7 | -84.1   | -176.6 | -110.9 |
| X <sup>7</sup>  | -70.0  | 130.0  | 56.9   | 129.5 | -175.6  | -106.8 | -122.1 |
| A <sup>8</sup>  | -67.3  | -176.5 | 52.5   | 134.7 | -180.0  | -103.6 | -118.8 |
| G <sup>9</sup>  | -68.6  | -170.7 | 48.5   | 135.0 | -177.9  | -99.2  | -113.3 |
| T <sup>10</sup> | -66.8  | -179.8 | 52.1   | 132.3 | 177.9   | -99.4  | -109.4 |
| C <sup>11</sup> | -64.6  | 177.1  | 55.2   | 131.3 | -174.8  | -95.4  | -121.3 |
| C <sup>12</sup> | -78.2  | -179.7 | 43.0   | 81.9  |         |        | -142.7 |
| G <sup>13</sup> |        |        | -169.3 | 145.2 | -173.5  | -95.7  | -131.4 |
| G <sup>14</sup> | -69.7  | -167.1 | 44.8   | 136.6 | 179.4   | -98.7  | -110.7 |
| A <sup>15</sup> | -65.4  | -174.5 | 48.8   | 131.1 | -175.2  | -92.5  | -112.4 |
| C <sup>16</sup> | -66.2  | 170.1  | 56.1   | 124.8 | -165.7  | -80.6  | -118.5 |
| T <sup>17</sup> | -74.4  | 169.8  | 48.8   | 82.2  | 55.9    | 70.8   | -118.5 |
| A <sup>18</sup> | -157.8 | -160.8 | 52.6   | 131.3 | -86.9   | 140.1  | -90.8  |
| G <sup>19</sup> | -78.8  | 132.9  | 54.3   | 128.7 | 179.6   | -101.8 | -118.8 |
| C <sup>20</sup> | -65.5  | -177.0 | 52.8   | 118.5 | -174.9  | -89.6  | -122.5 |
| T <sup>21</sup> | -62.4  | 166.0  | 57.2   | 108.6 | 179.8   | -93.3  | -125.8 |
| A <sup>22</sup> | -59.0  | 176.6  | 56.5   | 135.0 | -176.2  | -98.6  | -108.1 |
| G <sup>23</sup> | -70.4  | -177.7 | 48.1   | 122.8 | -168.3  | -89.4  | -113.0 |
| C <sup>24</sup> | -71.2  | 163.7  | 52.5   | 88.0  |         |        | -128.4 |

alpha: O3'(i-1)-P-O5'-C5'; beta: P-O5'-C5'-C4'; gamma: O5'-C5'-C4'-C3'; delta: C5'-C4'-C3'-O3'; epsilon: C4'-C3'-O3'-P(i+1); zeta: C3'-O3'-P(i+1)-O5'(i+1); chi for pyrimidines: O4'-C1'-N1-C2; chi for purines: O4'-C1'-N9-C4

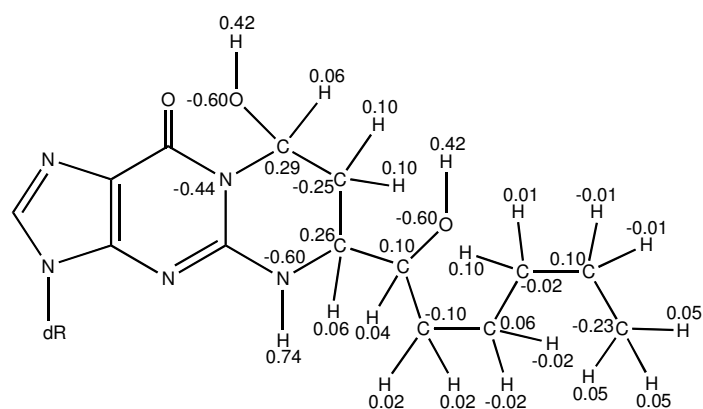

**Figure S1.** Force field parameters for the HNE-dG adduct obtained from DFT calculation.

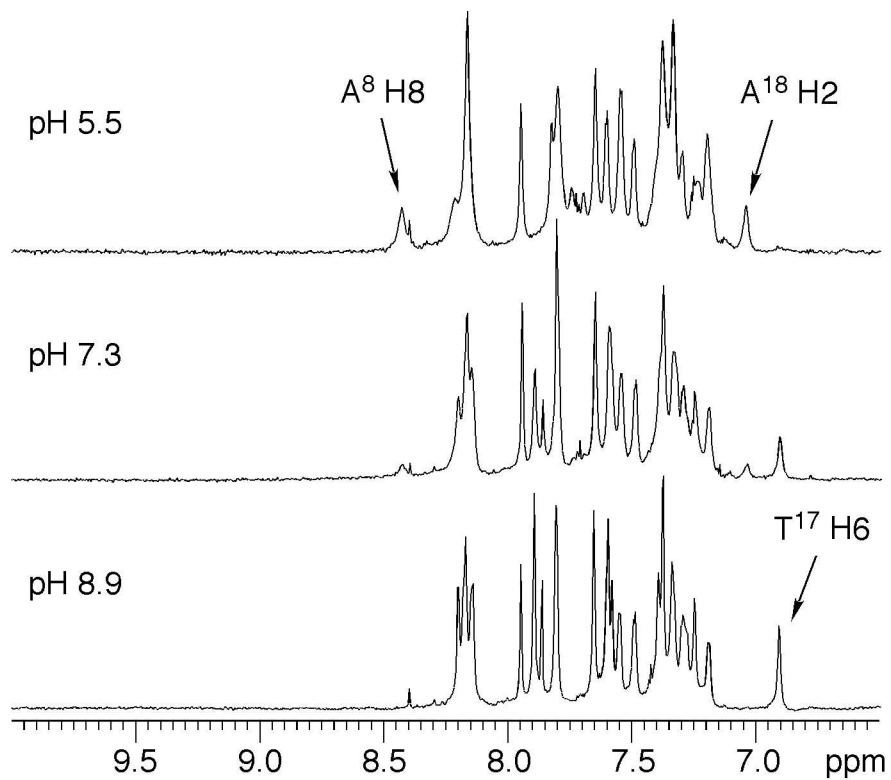

**Figure S2.**  $^1\text{H}$  NMR spectra of the mismatched 5'-CpX-3' duplex at different pHs indicating two conformations were in equilibrium. One was favored in acidic solution and the other was favored in basic solution.

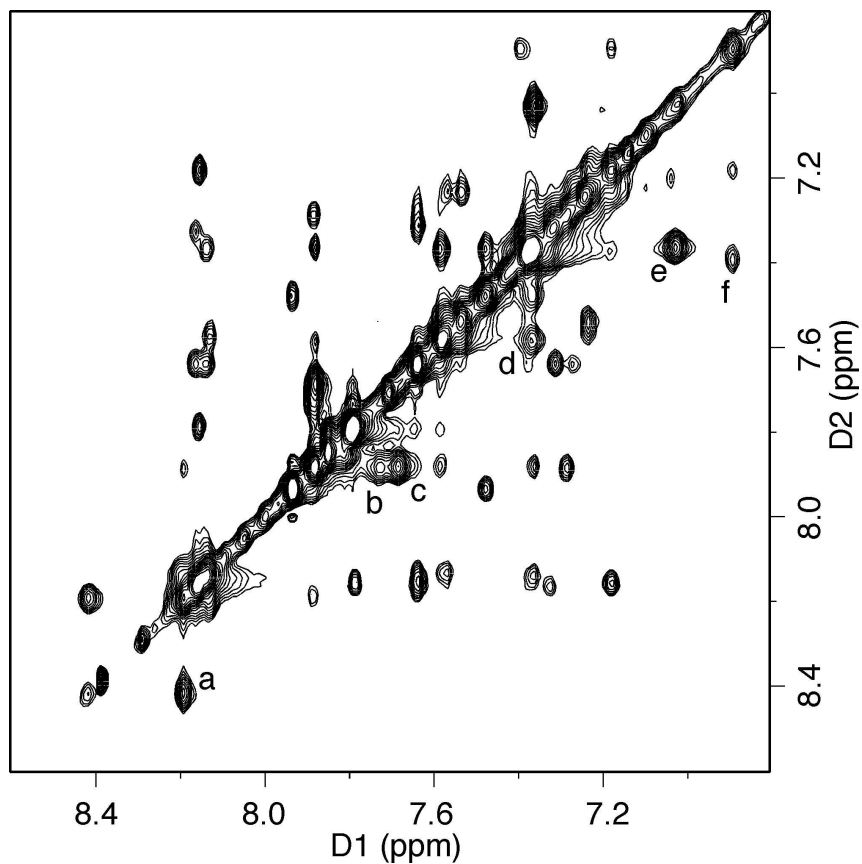

**Figure S3.** Two sets of resonances exhibiting exchange NOE interactions at pH 7.3, indicating the interconversion of the two conformations. The assigned exchange crosspeaks are designated the resonances at the adduct region: (a) A<sup>18</sup> H8, (b) G<sup>19</sup> H8, (c) A<sup>8</sup> H2, (d) X<sup>7</sup> H2, (e) A<sup>18</sup> H2, and (f) T<sup>17</sup> H6.

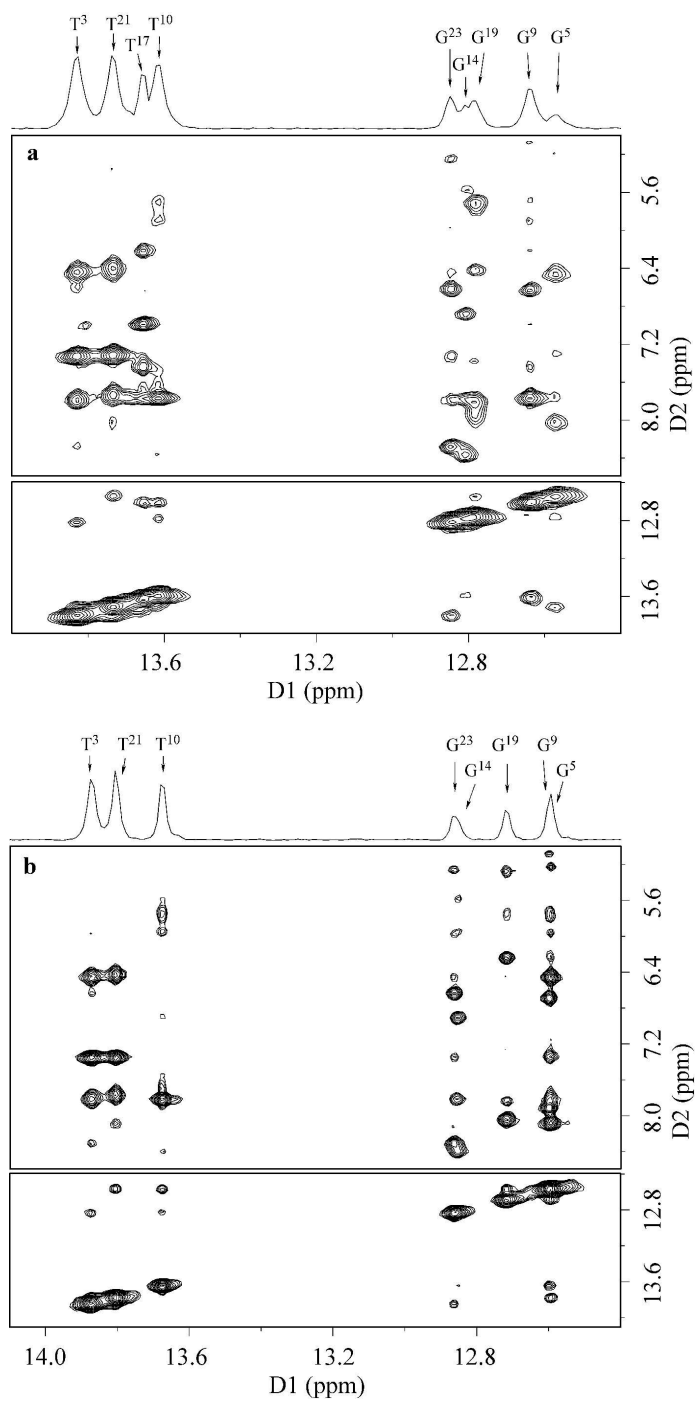

**Figure S4.** NOE cross peaks of the imino protons supporting the Watson-Crick hydrogen bonding: (a) At pH 5.5; (b) At pH 8.9.



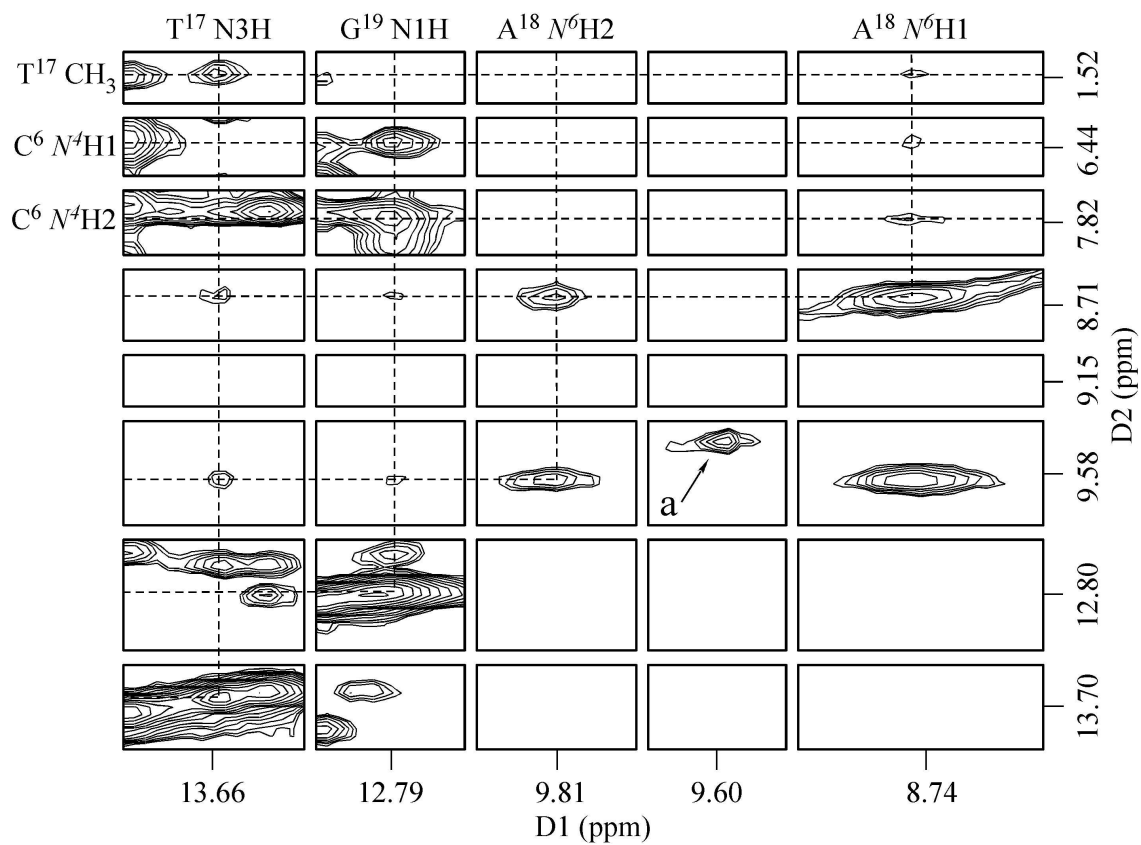

**Figure S5.** NOE cross peaks of the protonated A<sup>18</sup> amino protons at pH 5.5. Extra resonance at 9.61ppm (peak a) was assigned to N<sup>4</sup>H<sup>2</sup> of partially protonated C<sup>6</sup>.

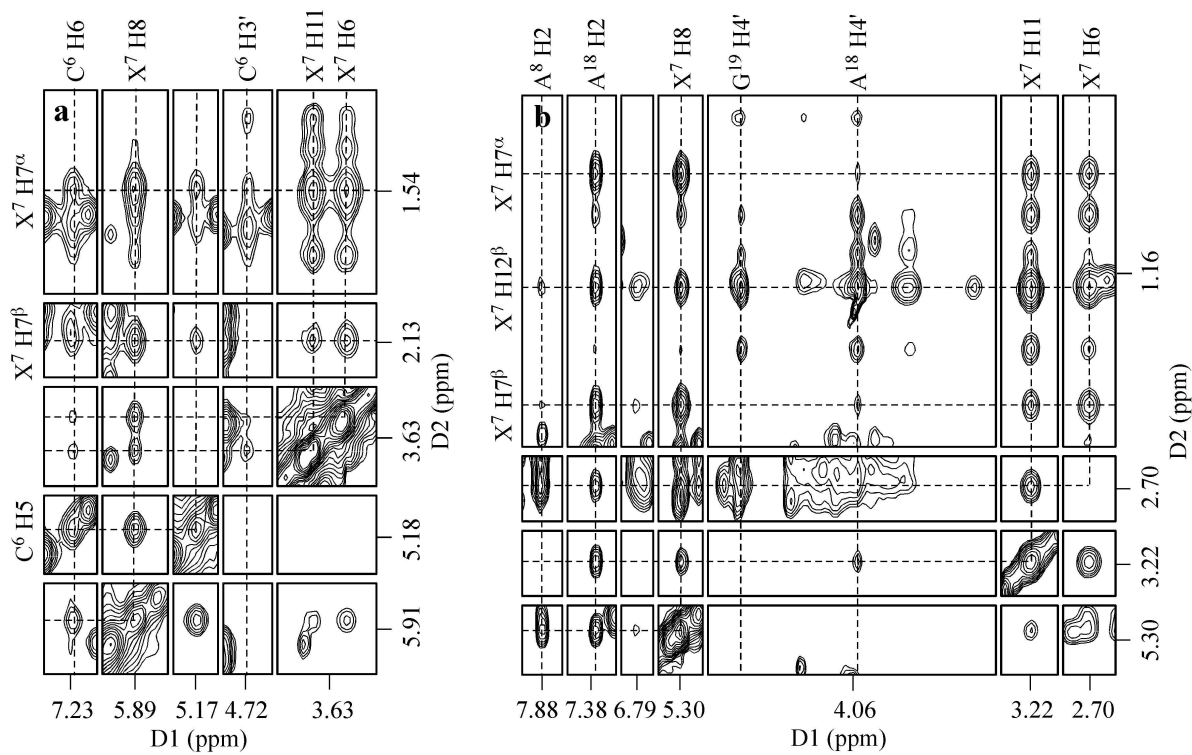

**Figure S6.** Some NOE crosspeaks associated with HNE protons: (a) At pH 5.5, HNE was located in the major groove; (b) At pH 8.9, HNE was located in the minor groove.

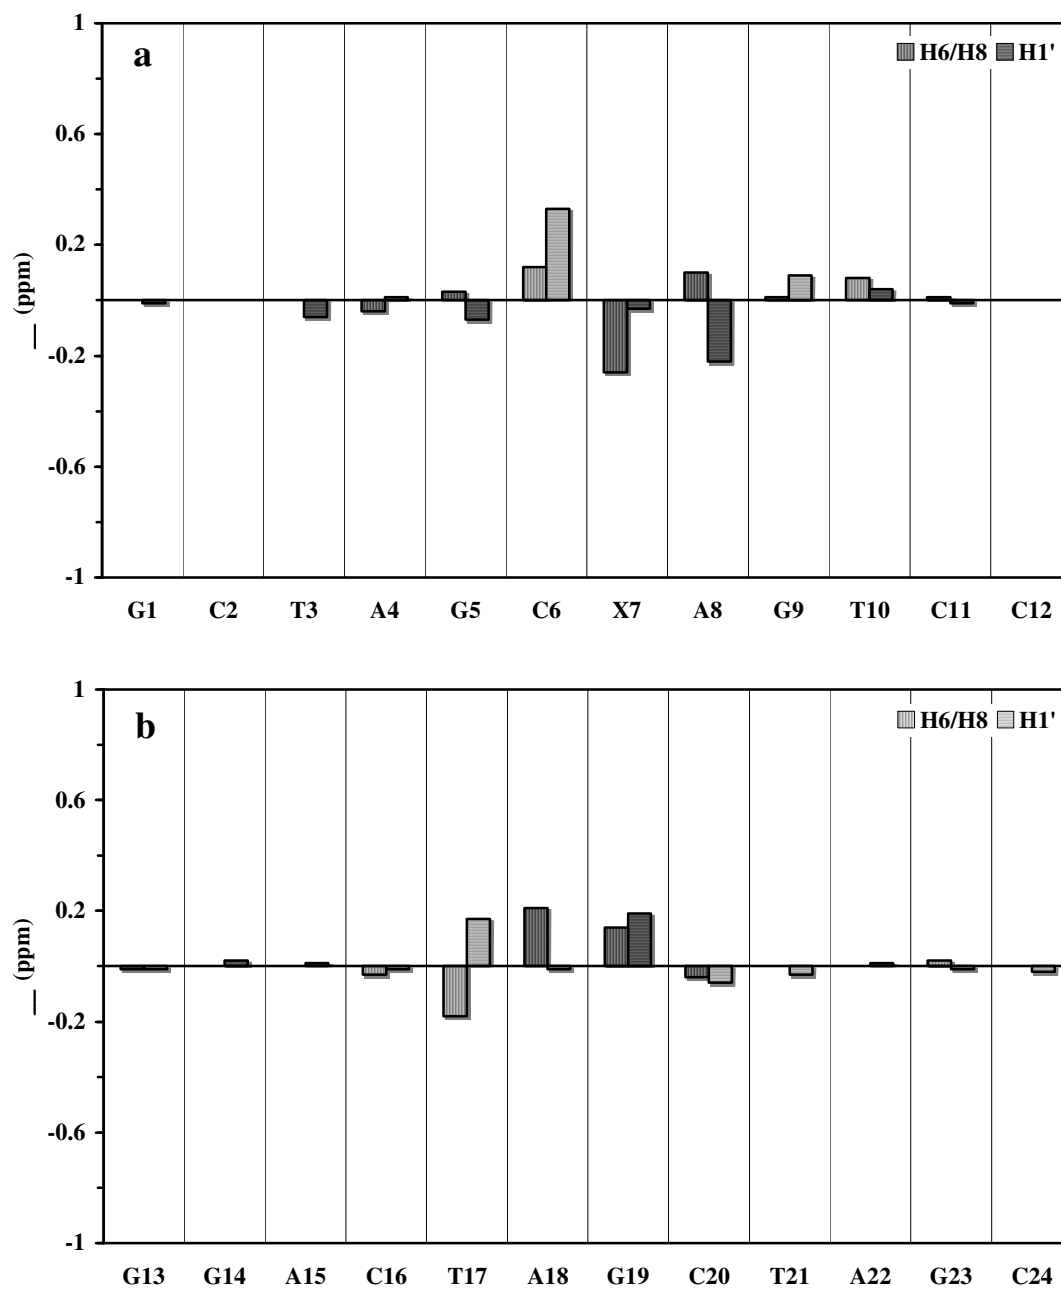

**Figure S7.** Chemical shift perturbations of the mismatched duplex at pH 8.9: (a) Adduct strand; (b) Complementary strand.

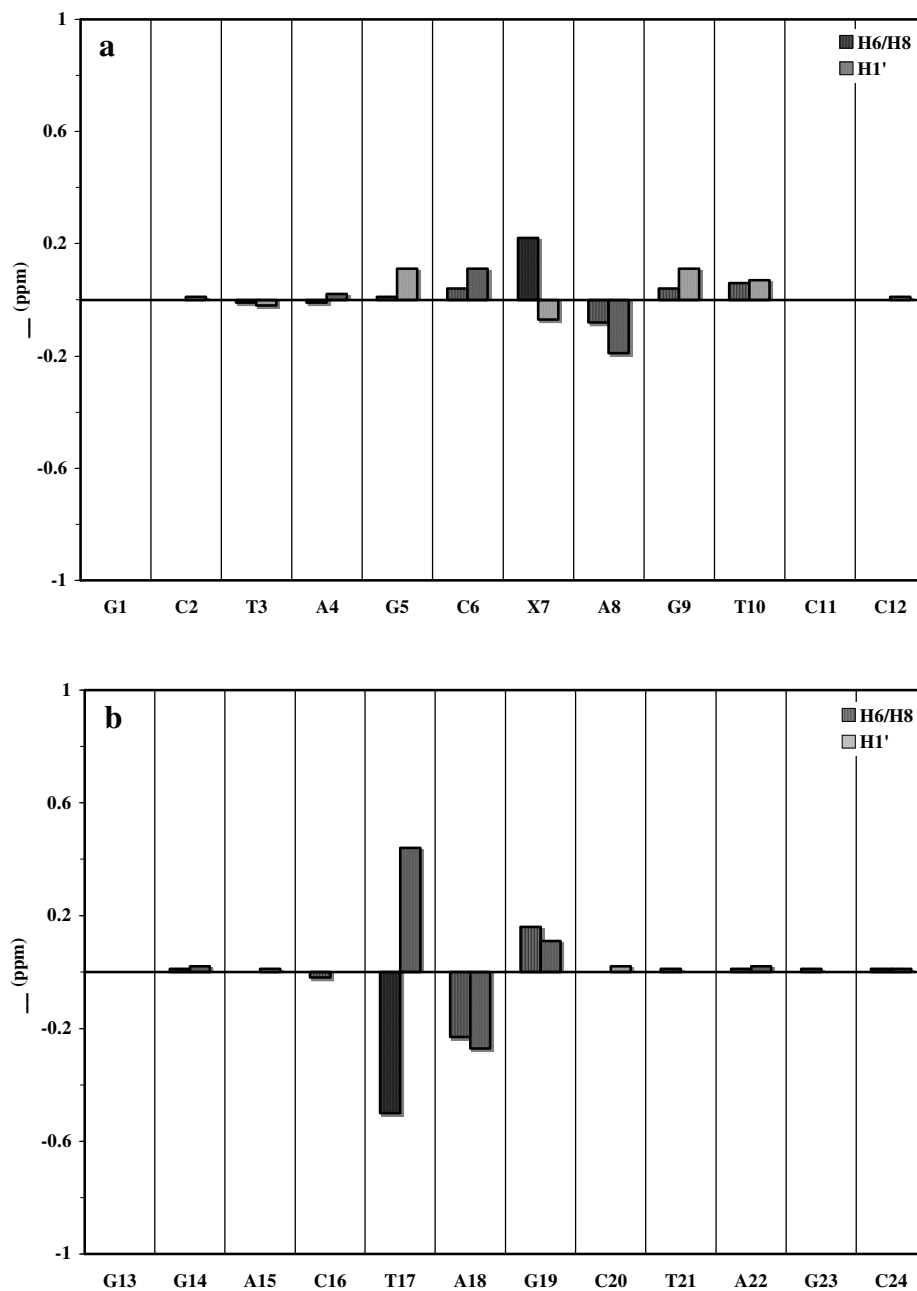

**Figure S8.** Chemical shift comparisons of the mismatched duplex between at pH 5.5 and 8.9: (a) Adduct strand; (b) Complementary strand.

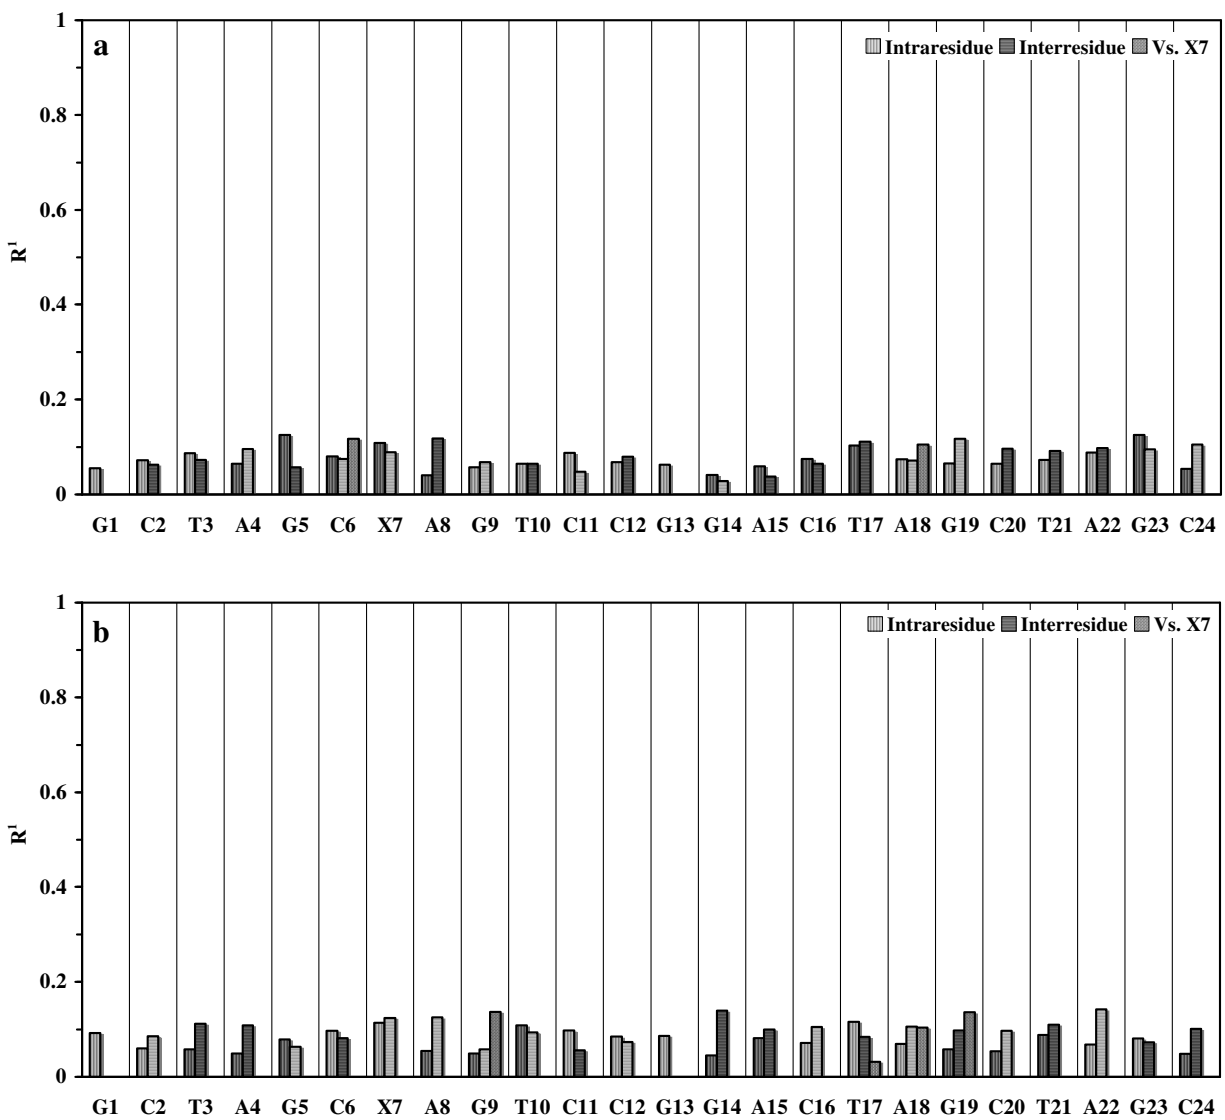

**Figure S9.** Residue-by-residue sixth root residuals ( $R_1^x$ ): (a) At pH 5.5; (b) At pH 8.9.

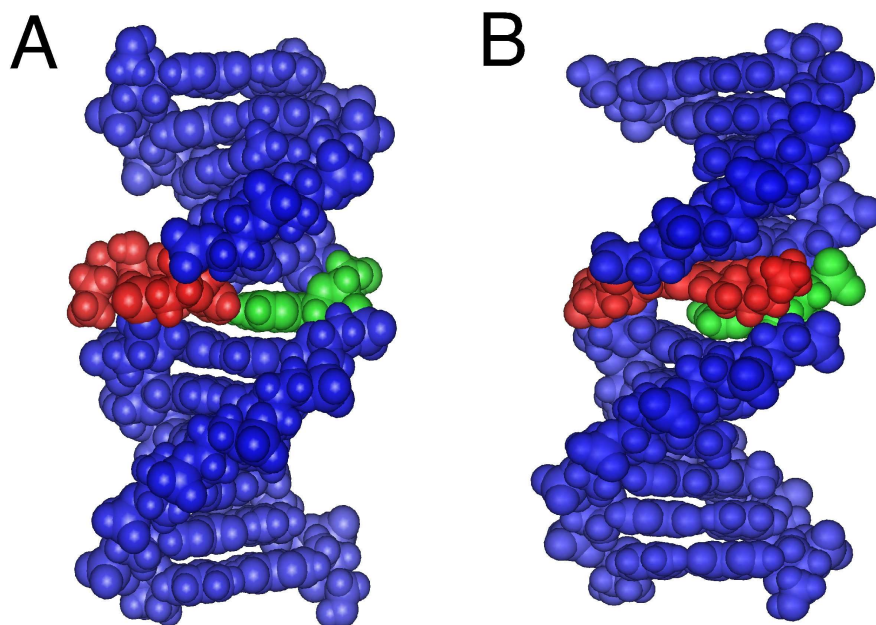

**Figure S10.** CPK models of average rMD structures of the mismatched 5'-CpX-3' duplex. Red, green, and blue boxes represent X<sup>7</sup>, HNE, and other nucleotides, respectively. (A) At pH 5.5. HNE was located in the major groove. (B) At pH 8.9. HNE was oriented towards the minor groove.
